18 **ABSTRACT (201)**

19 Phosphatidylinositol 4,5-bisphosphate (PIP<sub>2</sub>) regulates the function of many ion channels, including M-type  
20 (KCNQ1-5, Kv7) K<sup>+</sup> channels; however the molecular mechanisms involved in this regulation remain  
21 unclear. To identify the sites of action on KCNQ3 channels, we used as our baseline the A315T pore mutant  
22 (KCNQ3T) that increases channel currents without modifying the apparent affinity of PIP<sub>2</sub> and performed  
23 extensive mutagenesis in regions that have been suggested to be involved in PIP<sub>2</sub> interactions among the  
24 KCNQ family. Using the zebrafish (*Danio rerio*) voltage-sensitive phosphatase to deplete PIP<sub>2</sub> as a probe  
25 for apparent affinity of the channels, we found that PIP<sub>2</sub> modulates KCNQ channel function through four  
26 different domains. 1) the A-B helix linker that we previously identified as important for both KCNQ2 and  
27 KCNQ3, 2) the junction between S6 and the A helix (S6Jx), 3) the S2-S3 linker and 4) the S4-S5 linker. We  
28 found that PIP<sub>2</sub> interactions within these domains were not coupled to the voltage dependence of activation.  
29 Extensive homology modeling and docking simulations between the wild-type or mutant KCNQ3 channels  
30 and PIP<sub>2</sub>, correlated with the experimental data. Our results indicate that PIP<sub>2</sub> modulates KCNQ3 channel  
31 function by interacting synergistically with a minimum of four cytoplasmic domains.

## 32 INTRODUCTION

33 Voltage gated potassium (Kv) channels play critical roles in the function of various tissues including  
34 brain, heart and epithelia (Jentsch, 2000). Among Kv channels, KCNQ1-5 (Kv7.1-7.5) channels are  
35 regulated by a number of intracellular signaling molecules including phosphatidylinositol 4,5-bisphosphate  
36 (PIP<sub>2</sub>), which is present in the inner leaflet of the cell plasma membrane at only modest abundance. For  
37 some time, it has been known that interactions with PIP<sub>2</sub> regulate M-channel activity (Suh and Hille, 2002;  
38 Loussouarn et al., 2003; Zhang et al., 2003; Li et al., 2005; Winks et al., 2005; Gamper and Shapiro, 2007).  
39 However, several key questions remain elusive: How and where does PIP<sub>2</sub> regulate KCNQ channels, and are  
40 those mechanisms disparate between KCNQ1-containing channels and the others, or do they generalize  
41 among KCNQ1-5? To understand the molecular mechanisms by which PIP<sub>2</sub> regulates KCNQ channels, it is  
42 necessary to identify the site(s) of PIP<sub>2</sub> action. Kv channels are tetramers of subunits containing six  
43 transmembrane domains (S1-S6). The earliest study suggested that PIP<sub>2</sub> interacts with the junction between  
44 S6 and the first C-terminal “A helix” (which we call the S6Jx domain) of KCNQ2; thus, replacement of the  
45 histidine at position 328 in the S6Jx of KCNQ2 (H367 in KCNQ3, Fig. 1A) by a cysteine reduced the  
46 sensitivity of the channel to PIP<sub>2</sub> (Zhang et al., 2003). We identified a “cationic cluster” (K452, R459 and  
47 R461 in KCNQ2) in the linker between the A&B helices (A-B linker) of KCNQ2, KCNQ3 and KCNQ4,  
48 which were suggested to form electrostatic bonds with the phosphate head groups of PIP<sub>2</sub> molecules  
49 (Hernandez et al., 2008). Expanding on those findings, Tinker and co-workers localized a cluster of basic  
50 residues (K354, K358, R360 and K362) in the S6Jx of KCNQ1 channels (Thomas et al., 2011). In KCNQ3,  
51 the analogous K358, Q362, R364, and K366 residues (Fig. 1A) were suggested to interact with PIP<sub>2</sub>. More  
52 recent work has suggested two additional domains that interact with PIP<sub>2</sub> and regulate gating, the linker  
53 between transmembrane helices S2 and S3 (S2-S3 linker) and between the S4 and S5 helices (S4-S5 linker),  
54 domains in KCNQ1 channels whose interactions with PIP<sub>2</sub> were suggested moreover to be important for  
55 coupling between the voltage sensor and the gate (Zaydman et al., 2013). Lastly, a recent study based  
56 heavily on molecular dynamics simulations suggested state-dependent interactions between PIP<sub>2</sub> and the S2-  
57 S3 and S4-S5 linkers of KCNQ2 channels that were weakly coupled to the voltage dependence of activation  
58 (Zhang et al., 2013).

59 Lending support for a generalized structural interaction between PIP<sub>2</sub> and the region just distal to the  
60 final transmembrane helix of K<sup>+</sup> channels is the crystal structure of PIP<sub>2</sub> bound to the K<sub>ir</sub>2.2 channel  
61 (Hansen et al., 2011), which shows a PIP<sub>2</sub> molecule interacting with residues not only in the proximal C-  
62 terminus as it emerges from the lipid bilayer, but also residues at the distal end of the M2 helix. Thus, it  
63 behooved us to more systematically examine all of these regions of a KCNQ channel most amenable to  
64 study via a voltage-dependent phosphatase (VSP), which can dephosphorylate nearly all the PIP<sub>2</sub> in the  
65 plasma membrane within about 500 ms (Murata and Okamura, 2007). This method has been exploited to  
66 examine the PIP<sub>2</sub> sensitivity of KCNQ (Falkenburger et al., 2010; Kruse et al., 2012) and TRP (Itsuki et al.,  
67 2012) channels, among others. Most significantly, unlike reducing PIP<sub>2</sub> abundance by stimulating a G<sub>q</sub>- and  
68 phospholipase C (PLC)-coupled receptors, which could also produce inositol triphosphate (IP<sub>3</sub>), Ca<sup>2+</sup> rises,  
69 activate protein kinase C and induce other downstream signals, activation of VSP only dephosphorylates  
70 PIP<sub>2</sub> to PI(4)P, a singly-phosphorylated lipid that does not allow activation of M channels (Telezhkin et al.,  
71 2012; Telezhkin et al., 2013; Telezhkin et al., 2012).

72 The Hille group studied KCNQ2/3 heteromers and found that the time constant of dephosphorylation  
73 of available PIP<sub>2</sub> in the membrane of a tissue-culture cell is ~250 ms (Falkenburger et al., 2010); in that  
74 work, while not quantifying the k<sub>on</sub> or k<sub>off</sub> of PIP<sub>2</sub>, they found a “dwell time” of ~10 ms to be consistent with  
75 the modeling of their data, most likely due to the low-affinity of KCNQ2 subunits that determine whether  
76 KCNQ2/3 channels are open or closed. Hence, mutations that decrease their apparent affinity of PIP<sub>2</sub>,  
77 resulting in “dwell times” necessarily shorter than 10 ms in KCNQ2-containing channels can not possibly  
78 be meaningfully quantified during the decay of the current during the depolarization step to a very positive  
79 potential that activates Dr-VSP, since any shorter k<sub>off</sub> would be wholly confounded by the time required for  
80 PIP<sub>2</sub> dephosphorylation. In such a case, only any altered rate of recovery of the current, reflecting an altered  
81 k<sub>on</sub>, could be meaningful. Thus, such relatively low PIP<sub>2</sub> apparent-affinity channels are unsuitable for this  
82 approach. For these reasons, we choose KCNQ3 homomers as our test channel, due to its extremely high  
83 apparent affinity for PIP<sub>2</sub>, as manifested by its saturating open probability near unity at saturating voltages,  
84 and its maximal depression by M<sub>1</sub> receptor stimulation of only ~40% (Li et al., 2005; Hernandez et al.,  
85 2009), vs. <0.3, and 90%, respectively, for all other KCNQ isoforms and compositions. Our assumption was

86 that that this channel would be amenable to such analysis using the VSP approach, and that high structural  
87 and mechanistic similarity with the other KCNQ subtypes should make our data generalizable among this  
88  $K^+$  channel family. In some experiments we used the alternative assay of quantifying the extent of  
89 depression of the current by stimulation of muscarinic  $M_1$  receptors ( $M_1$ Rs) co-expressed with the channels  
90 (*see below*).

91 In our patch-clamp experiments, we used the well-expressing KCNQ3 A315T (KCNQ3T) channel as  
92 a baseline, an inner-pore mutant that increases current amplitudes by >10-fold (Zaika et al., 2008; Choveau  
93 et al., 2012), without changing the open probability of the channels or their apparent  $PIP_2$  affinities  
94 (Hernandez et al., 2009). We probed the effects of charge neutralization in the S2-S3 linker, the S4-S5  
95 linker, the S6Jx domain and the A-B helix linker on changes in the apparent  $PIP_2$  affinity of the channels, as  
96 well as their voltage dependence of activation. In addition, homology modeling and  $PIP_2$ -docking  
97 simulations were performed to seek a structural framework for our experimental results. We find that all the  
98 regions tested complement the  $PIP_2$ -binding “cationic cluster” previously described in the A-B helix linker  
99 for KCNQ2 and KCNQ3 (Hernandez et al., 2008). Whereas the four domains identified here for KCNQ3 as  
100 interacting with  $PIP_2$  are conserved with KCNQ1, and likely, KCNQ2, mutations that lower the apparent  
101 affinity of the channels for  $PIP_2$  were not correlated with alterations in voltage dependence.

102

## 103 RESULTS

104 We choose *Danio rerio* (Dr)-VSP because it activates at +40 mV, well positive to the saturating  
105 voltage for all KCNQ channels. Upon activation of Dr-VSP by depolarization to +120 mV, which  
106 dephosphorylates  $PIP_2$  into PI(4)P, quantification of the rate of decay of the current provides an estimate of  
107 changes in  $k_{off}$  of  $PIP_2$  from the channels due to mutations. We realize that this is an approximation, due to  
108 confound of the known rate of Dr-VSP dephosphorylation of  $PIP_2$  by Dr-VSP at that voltage ( $\tau \sim 250$  ms).  
109 However, the deconvolution of those rates is beyond the scope of this paper; moreover, we would need  
110 information on the allosteric influence of the binding of one  $PIP_2$  molecule with one subunit on its affinity  
111 with another, and the precise number of  $PIP_2$  molecules required for the opening of KCNQ3 homomers, and  
112 both sets of data are lacking at this time. Upon the step back to +30 mV, changes in  $k_{on}$  of  $PIP_2$  due to  
113 mutations were estimated by the rate of recovery of the current. We again realize that this estimate is an  
114 approximation due to the confound of the known rate of PI(4)P-5 kinase ( $\tau \sim 10$ s) (Falkenburger et al.,  
115 2010). Again, a more sophisticated deconvolution would be extremely difficult without more information,  
116 which is not presently available.

117 Besides the measurements described above, we also compared the amplitude of tonic whole-cell  
118 currents between cells transfected with KCNQ3T and mutant KCNQ3T channels, and the voltage  
119 dependence of activation. The first measurement is based on the correlation between the tonic open  
120 probability at the single-channel level, macroscopic current amplitudes and  $PIP_2$  apparent affinity, observed  
121 for KCNQ2, KCNQ2/3, KCNQ3 and KCNQ4 channels (Li et al., 2005; Hernandez et al., 2009) and other  
122  $PIP_2$ -regulated channels, *e.g.*, GIRK channels as well (Bender et al., 2002; Winks et al., 2005). The voltage  
123 dependence of activation is important because whether  $PIP_2$ -mediated depression of KCNQ1-containing  
124 channels is accompanied by altered voltage dependence is still open to debate (Loussouarn et al., 2003;  
125 Zaydman et al., 2013) and  $PIP_2$ -mediated modulation of KCNQ2/3 channels does not change the voltage  
126 dependence of activation (Shapiro et al., 2000; Nakajo and Kubo, 2005; Suh et al., 2006). Whereas the A-B  
127 helix linker “cationic” cluster domain identified in  $PIP_2$  interactions with KCNQ2 and KCNQ3 in our  
128 previous work (Hernandez et al., 2009) is not conserved in KCNQ1, the S6Jx, S4-S5 linker and S2-S3 linker  
129  $PIP_2$ -interaction domains are conserved, which for KCNQ1 were suggested to form a network of  $PIP_2$ -  
130 interacting domains that are involved in voltage-sensor/gate coupling to voltage dependence (Zaydman et al.,  
131 2013). We were therefore keen to investigate these issues for the case of KCNQ3, which is found primarily  
132 in neurons, as opposed to cardiomyocytes or epithelia. With the parameters and assumptions given, we can  
133 now present the data.

134

### 135 *Interactions of $PIP_2$ with the S2-S3 and the S4-S5 linkers in KCNQ3*

136 Several recent studies have suggested a potential role of the S2-S3 and the S4-S5 linkers in  $PIP_2$ -  
137 KCNQ channel interactions (Park et al., 2005; Zaydman et al., 2013; Zhang et al., 2013; Zhou et al., 2013).  
138 Since these sites are most novel in terms of  $PIP_2$  interactions suggested for KCNQ2-5 channels, we begin  
139 here. For KCNQ1, the interactions with the S2-S3 linker involve R190 and R195, and for the S4-S5 linker,

140 involve R243, H258 and R259. The sequence alignment of the S2-S3 and the S4-S5 linkers among KCNQ1-  
141 5 channels (Fig. 1A) indicates R190, R195 and H258 residues to be conserved. We tested the effect of  
142 charge neutralizing mutations at the analogous positions, R190 and R195, in the S2-S3 linker, and H257  
143 (corresponding to H258 in KCNQ1) in the S4-S5 linker of KCNQ3T (Figs. 1A, B, C; Fig. 2). In the S2-S3  
144 linker, the R190Q mutation, but not R195Q, decreased current densities from  $197 \pm 6$  pA/pF to  $66 \pm 12$   
145 pA/pF ( $n = 6$ ,  $p < 0.001$ ) (Figs. 2A, B; Table 1). Using the Dr-VSP assay, we found the rate of current decay  
146 upon depolarization that turns-on Dr-VSP for the R190Q mutant ( $0.35 \pm 0.11$  s,  $n = 8$ ,  $p < 0.01$ ) to be much  
147 faster than for KCNQ3T ( $0.94 \pm 0.13$  s,  $n = 10$ ) (Figs. 2D, E); however, the rates of recovery of the current  
148 were  $7.5 \pm 1.7$  s and  $9.6 \pm 1.6$  s ( $n = 10-11$ ) for KCNQ3T and KCNQ3T-R190Q respectively, values not  
149 significantly different. The same result was obtained from the analogous mutant R190A (decay =  $0.35 \pm 2$  s,  
150 recovery =  $7.5 \pm 1.8$  s;  $n = 6$ ). Neither response was altered by the R195Q mutation. Either R190 influences  
151  $K_{off}$  for PIP<sub>2</sub>, but not  $k_{on}$ , or our assay is not sensitive enough to detect changes in both rates accurately. As  
152 an alternative assay, we turned to the classic M<sub>1</sub>R-dependent depression of the current in cells coexpressing  
153 M<sub>1</sub> muscarinic receptors and KCNQ3T mutants. Since maximal M<sub>1</sub>R stimulation in tissue-culture cells leads  
154 to about an 80% decrease in PIP<sub>2</sub> abundance, rather than to near zero when VSPs are activated  
155 (Falkenburger et al., 2010), the maximal depression of KCNQ3 currents is only ~30-40%, since enough PIP<sub>2</sub>  
156 molecules remain in the membrane to keep most KCNQ3 channels PIP<sub>2</sub>-bound (Suh et al., 2006; Hernandez  
157 et al., 2009). Thus, for such high PIP<sub>2</sub> apparent-affinity channels, a change in that affinity is manifested most  
158 in the fractional suppression of the current, not a shift of the dose-response relation of [agonist] vs. current  
159 suppression (Fig S1F). In these experiments, we decided to use mutants in which the arginines at positions  
160 190 and 196 were mutated to alanines, instead of the highly hydrophilic and bulky glutamines, which can  
161 interact with PIP<sub>2</sub> via several types of H<sup>+</sup>-bonds, to avoid any such confounding effects. Consistent with  
162 previous work, we found the KCNQ3T current to be suppressed by a supramaximal concentration (10 μM)  
163 of the receptor agonist, oxotremorine methiodide (oxo-M), by only  $32.9 \pm 8.9$  % ( $n = 3$ ); similarly for cells  
164 expressing KCNQ3T-R195A the maximal inhibition was  $24.9 \pm 5.8$  % ( $n = 7$ ); whereas for KCNQ3T-  
165 R190A the maximal inhibition was  $63 \pm 13$  % ( $n = 6$ ;  $p < 0.05$ ) indicating the R190A mutation to reduce  
166 PIP<sub>2</sub> affinity, consistent with the Dr-VSP assay (Figs. 2G, S1). Neither the R190Q/A, nor the R195Q/A,  
167 mutations affected the voltage dependence of activation (Fig. 2C), suggesting that the apparent affinity of  
168 PIP<sub>2</sub> for this site to be unrelated to voltage dependence.

169 We found the H257N mutation in the S4-S5 linker (Figs. 1B, C and 2) to result in strongly reduced  
170 current densities, from  $197 \pm 6$  pA/pF to  $30 \pm 3$  pA/pF ( $n = 7$ ,  $p < 0.001$ ); the rate of current decay after Dr-  
171 VSP activation was much faster than KCNQ3T ( $0.58 \pm 0.14$  s,  $n = 4$ ,  $p < 0.05$ ) and the rate of recovery was  
172 slightly slower ( $11.03 \pm 1.4$ ,  $n = 2$ ) although it was not suitable for analysis in most of the cells recorded,  
173 probably due to the astounding shift in the voltage dependence of activation from  $-34.0 \pm 1.9$  mV in  
174 KCNQ3T to  $2.5 \pm 2.8$  mV in H257N ( $n = 7-19$ ). Thus we turned again to quantifying the result of M<sub>1</sub>R  
175 stimulation; for cells co-transfected with M<sub>1</sub>Rs and the KCNQ3T-H257N mutant, the maximal inhibition  
176 was  $81.6 \pm 7.9$  % ( $n = 4$ ) (Fig. 2G, S1). Together this results indicate that the H257N mutation reduces the  
177 apparent PIP<sub>2</sub> affinity of the channels.

178 Since the R243H mutation in the S4-S5 linker was shown to reduce the apparent affinity of KCNQ1  
179 for PIP<sub>2</sub> (Park et al., 2005) and R243 is conserved in other KCNQ channels (R242 in KCNQ3) (Fig. 1A), we  
180 also tested the effect of the R242A mutation on KCNQ3T channels (Fig. 2). This mutant resulted in reduced  
181 current densities ( $146 \pm 16$  pA/pF,  $n = 7$ ,  $p < 0.001$ ) and slowed rate of current recovery ( $14.2 \pm 1.7$  s,  $n = 10$ ,  
182  $p < 0.05$ ) in the VSP assay, nonetheless, the rate of decay upon turn-on of Dr-VSP was not significantly  
183 affected ( $0.77 \pm 0.13$  s,  $n = 10$ ). M<sub>1</sub>R stimulation inhibited the current by  $64.8 \pm 9.2$  % ( $n = 3$ ;  $p < 0.01$ ), two  
184 fold greater than for KCNQ3T (Fig. 2G, S1). These results are consistent with a role of R242 in PIP<sub>2</sub>  
185 interactions. This mutation resulted also in a pronounced shift of the voltage-dependence of activation  
186 towards more positive potentials ( $V_{1/2}$ :  $-4.0 \pm 3.2$  mV,  $n = 7$ ) (Fig. 2C). The adjacent mutation R243A was  
187 also tested; this mutant displayed reduced current densities as well ( $56 \pm 16$  pA/pF,  $p < 0.001$ ), faster rate of  
188 current decay upon Dr-VSP turn-on ( $0.59 \pm 0.19$  s,  $p < 0.05$ ) and slowed recovery after Dr-VSP turn-off  
189 ( $13.1 \pm 1.8$  s,  $p < 0.05$ ). Surprisingly the voltage-dependence of activation for this adjacent mutant was not  
190 affected ( $V_{1/2}$ :  $-31 \pm 4.7$  mV,  $n = 4$ ). When both arginines were mutated to alanines, the whole-cell current  
191 densities were reduced ( $65 \pm 11$  pA/pF,  $n = 11$ ,  $p < 0.001$ ), similar to the R243A single mutant. The rate of  
192 current decay and recovery after Dr-VSP turn-on or turn-off were significantly affected ( $0.45 \pm 0.11$  s,  $p <$   
193  $0.01$  and  $15 \pm 1.7$  s,  $p < 0.05$ ;  $n = 5$ ) to a greater extent than either of the single mutations. The voltage-

194 dependence of activation of the double mutant displayed the same positive shift as for the R242A single  
195 mutant ( $V_{1/2}$ :  $-0.2 \pm 2.9$  mV,  $n = 5$ ). The  $M_1R$ -mediated inhibition of the double mutant was  $91.6 \pm 2.7$  % ( $n$   
196 = 4) (Fig. 2G). These results are consistent with an interaction of the KCNQ3 S4-S5 linker with  $PIP_2$ , which  
197 again seems not to be coupled to the voltage dependence of activation of the channels. Clearly, however, the  
198 S4-S5 linker of KCNQ3 itself is coupled to channel voltage dependence, just not in a way that involves  $PIP_2$ .  
199 A summary of the data is presented in Table 1.

200

### 201 ***Interactions of $PIP_2$ with the S6Jx domain in KCNQ3 channels***

202 Three basic residues (K354, R360, and K362) in the S6Jx of KCNQ1, which are conserved in  
203 KCNQ3 (K358, R364 and K366) (Fig. 1A), have been found to play a role in  $PIP_2$  interactions (Eckey et al.,  
204 2014). In addition, Telezhkin and coworkers found the R325A mutation in KCNQ2, homologous to R360 in  
205 KCNQ1 and R364 in KCNQ3, to decrease the apparent affinity of the channel for DiC8- $PIP_2$  (Telezhkin et  
206 al., 2013), and early work implicated a role of H328 in KCNQ2, homologous to H367 in KCNQ3 (Zhang et  
207 al., 2003). Since the K358, R364, K366 and H367 residues in the S6Jx domain are conserved among KCNQ  
208 channels (Fig. 1A), we asked whether  $PIP_2$  interacts with the S6Jx domain in KCNQ3T channels (Fig. 4).  
209 We found the R364A mutation to significantly decrease current amplitudes ( $72 \pm 8$  pA/pF, vs.  $197 \pm 6$   
210 pA/pF for KCNQ3T,  $n = 6$ ,  $p < 0.001$ ); whereas the K358A and K366A mutations did not ( $195 \pm 7$  and  $187$   
211  $\pm 12$  pA/pF,  $n = 8-9$ , respectively) (Fig. 4A, B). As before, we measured the responses of each mutant to  
212  $PIP_2$  dephosphorylation by Dr-VSP and the rate of recovery upon Dr-VSP turn-off and found the R364A  
213 mutation to result in a much faster decay of the current ( $0.14 \pm 0.02$  s,  $n = 5$ ,  $p < 0.001$ ) upon activation of  
214 Dr-VSP, and a much slower recovery of the current ( $27.7 \pm 6.9$  s,  $n = 5$ ,  $p < 0.001$ ) upon its turn off (Fig.  
215 3D-F, Fig. S1 C, D, Table 1). The rates of current decay and recovery of K358A and K366A were not  
216 significantly altered (Figs. 3D-F, Table 1), nor was the maximal inhibition by  $M_1R$  stimulation ( $25.1 \pm 6.8$  %,  
217  $n = 4$ ).

218 We also tested the effect of the K358A and K366A mutations in combination with R364A as the  
219 triple mutant KRK-AAA. The KRK-AAA mutant decreased the current amplitude similarly as did R364A  
220 ( $79 \pm 11$  pA/pF,  $n = 8$ ), and such channels indicated a similarly reduced apparent affinity for  $PIP_2$  ( $\tau_{decay} =$   
221  $0.29 \pm 0.04$  s;  $\tau_{recovery} = 17.9 \pm 2.6$  s,  $n = 6-7$ ,  $p < 0.001$ ) using the Dr-VSP assay, (Fig. 3A, B, D-F; Table 1),  
222 echoing the results of the single point mutants. None of these single point mutations significantly affected  
223 channel voltage dependence (Fig. 3C). Strikingly, however, the KRK-AAA triple-mutation uniquely in this  
224 domain resulted in channels with a voltage dependence of activation markedly shifted towards more positive  
225 potentials. For KCNQ3T and KCNQ3T-KRK-AAA, the half activation potentials were:  $-34.0 \pm 1.9$  and  $-6.3$   
226  $\pm 2.5$  ( $n = 7-19$ ), respectively. We also tested the effects of the H367C mutation on KCNQ3T, which is  
227 slightly downstream of R364 in the S6Jx domain. This mutation only slightly reduced current densities ( $138$   
228  $\pm 5$  pA/pF,  $n = 6$ ,  $p < 0.01$ ), but significantly increased the rate of decay of the current ( $0.32 \pm 0.05$  s,  $n = 6$ ,  
229  $p < 0.01$ ) upon activation of Dr-VSP, and slowed its recovery ( $36.7 \pm 6.9$  s,  $n = 6$ ,  $p < 0.001$ ) upon Dr-VSP  
230 turn-off, indicating an interaction of this residue with  $PIP_2$ , as shown for KCNQ2 (Zhang et al., 2003). Such  
231 mutant channels displayed no significant shift in the voltage dependence of activation (Fig. 3C, Table 1).  
232 Taken together, these results strongly implicate the S6JxA domain of KCNQ3 channels as an important site  
233 for  $PIP_2$  interactions, as for KCNQ1 channels, and this altered apparent affinity for  $PIP_2$  also seems not to  
234 linked an altered voltage dependence of activation.

235

### 236 ***The A-B helix linker contributes strongly to the apparent affinity for $PIP_2$ .***

237 We previously identified a cluster of basic residues (K425, K432, and R434) in the linker between  
238 helices A and B (A-B linker) of both KCNQ2 and KCNQ3 to be critical for  $PIP_2$ -mediated control of gating,  
239 with mutations of this cluster in KCNQ2 to be somewhat more potent than for KCNQ3 (Hernandez et al.,  
240 2008). However, a study that deleted the A-B helix domain of KCNQ2 did not find that this deleted domain  
241 reduced the  $PIP_2$  apparent affinity for KCNQ2 channels (Aivar et al., 2012). Thus, we tested the importance  
242 of this domain of KCNQ3 using the same assays as before. We found that the deletion of the A-B linker ( $\Delta$   
243 linker) decreased whole-cell current amplitudes by about half ( $112 \pm 10$  pA/pF,  $n = 11$ ,  $p < 0001$ ) (Figs. 4A,  
244 B). In cells co-expressing KCNQ3T ( $\Delta$  linker) with Dr-VSP (Fig. 4D), the rate of current decay upon Dr-  
245 VSP turn-on was  $\sim 3$ -fold faster ( $0.26 \pm 0.04$  s,  $n = 7$ ,  $p < 0.001$ ), compared to KCNQ3T (Fig. 4E, Table 1),  
246 and the rate of current recovery upon turn-off of Dr-VSP was significantly slower ( $13.5 \pm 2.2$  s,  $n = 7$ ,  $p <$

247 0.05) (Fig. 4F, Table 1). Such data reinforce a critical role of the helix A-B linker in PIP<sub>2</sub> interactions with  
248 KCNQ3 channels, correlating with changes in open probability found for the triple (K425E/K432E/R434E)  
249 KCNQ3 mutant within in the A-B linker previously studied in excised single-channel patches (Hernandez et  
250 al., 2008). Lastly, as for the other PIP<sub>2</sub>-interacting domains, the KCNQ3T ( $\Delta$  linker) did not display any  
251 significant shift in channel voltage dependence, with  $V_{1/2}$  values for KCNQ3T and KCNQ3T ( $\Delta$  linker)  
252 currents of  $-34.0 \pm 1.9$  mV and  $-32.5 \pm 1.5$  mV, respectively (Fig. 4C; Table 1).

253 We wondered what the result would be of combining both the RH-AC mutation within the S6Jx  
254 domain with the KCNQ3T ( $\Delta$  linker) mutant. To our surprise, such severely mutated channels nonetheless  
255 still yielded very small, but observable, PIP<sub>2</sub>-dependent currents (Fig. 4). Thus, the whole-cell current  
256 density was dramatically decreased from  $197 \pm 6$  to  $16 \pm 2$  pA/pF ( $n = 8$ ,  $p < 0.001$ ) (Fig. 4B, Table 1). PIP<sub>2</sub>  
257 depletion induced by Dr-VSP rapidly and nearly completely abolished currents from the RH-AC/ $\Delta$  linker  
258 mutant, with a faster rate of decay upon Dr-VSP turn-on ( $0.53 \pm 0.1$  s,  $n = 6$ ,  $p < 0.05$ ), and a slower rate of  
259 recovery upon turn-off of Dr-VSP ( $45.8 \pm 5.2$  s,  $n = 6$ ,  $p < 0.001$ ), than for KCNQ3T channels (Figs 4D-F;  
260 Table 1). The small amplitude of the currents from such severely-mutated channels tested here preclude any  
261 significant meaning from comparing data from those channels and those from the RH-AC or the  $\Delta$  linker  
262 mutant alone. They do reinforce the presence of two major PIP<sub>2</sub> interaction sites within the C-terminus of  
263 KCNQ3 channels, one in the A-B linker, as previously reported (Hernandez et al., 2008), and the other  
264 within the S6Jx domain.

265 Recently, the first two of a three-lysine cluster located at the end of the B-helix of KCNQ1 (K526,  
266 K527, K528) have been identified as a critical site where CaM competes with PIP<sub>2</sub> to stabilize the open state  
267 of KCNQ1-containing channels (Tobelaïm et al., 2017a, b). Since this site is conserved in KCNQ3 (K531,  
268 K532 and K533), we independently mutated the three lysines to asparagines and tested them for interaction  
269 of PIP<sub>2</sub> using our VSP approach. Neither the current decay nor recovery, was altered by any of the three  
270 mutations (Table 1), indicating that this basic cluster is not involved on PIP<sub>2</sub> binding in KCNQ3. Whether  
271 this site plays a role on CaM modulation of KCNQ3 channels remain to be determined. It is likely that the  
272 involvement of this domain differs between KCNQ1 and KCNQ3.

273

### 274 ***Differences in plasma-membrane expression of KCNQ3T mutant channels do not explain altered current*** 275 ***amplitudes***

276 Since we use whole-cell current amplitudes as one measure of PIP<sub>2</sub> sensitivity in this study, it was  
277 incumbent upon us that we rule out the possibility of differential membrane expression of the mutants  
278 suggested to have altered apparent affinity for PIP<sub>2</sub>, since this would confound our results. We and others  
279 have found visualization of membrane proteins tagged with fluorescent proteins under total internal  
280 reflection fluorescence (TIRF, evanescent wave) microscopy, which isolates emission from fluorophores  
281 within 300 nm of the membrane (Axelrod, 2003), to be by far the most reliable measure of such membrane  
282 expression (Bal et al., 2008; Zaïka et al., 2008; Boyer and Slesinger, 2010). Under TIRF-illumination, we  
283 measured the emission from YFP-tagged WT and mutant KCNQ3T channels expressed in CHO cells (Fig.  
284 5). These data indicate that the decrease of the whole-cell current density is not due to divergent expression  
285 of mutant KCNQ3T channels in the plasma membrane. In fact, the YFP emission from KCNQ3T (H257N)  
286 is even higher than that of KCNQ3T, suggesting that the H257N mutation increases the number of channels  
287 at the plasma membrane. Thus, differential membrane abundance of channel proteins does not underlie the  
288 differences in macroscopic current amplitudes reported in this study.

289

### 290 ***PIP<sub>2</sub> is predicted to interact with the S4-S5 linker/S6Jx interface of KCNQ3 channels***

291 Our electrophysiological data are consistent with localization of KCNQ3-PIP<sub>2</sub> interactions to four  
292 distinct cytoplasmic locations: the A-B helix linker, the S6Jx domain, the S2-S3 linker and the S4-S5 linker.  
293 In an attempt to construct a framework of these four sites into a coherent structural model of PIP<sub>2</sub>  
294 interactions with the channels, we performed homology modelling and PIP<sub>2</sub> docking simulations for all of  
295 the mutants studied in this work. Our overall hypothesis emerging from the experimental data supposes a  
296 network of interactions between basic residues located in the S2-S3 linker, the S4-S5 linker, and the S6Jx  
297 that, together with the A-B helix linker, govern the PIP<sub>2</sub>-mediated regulation of KCNQ3 channel gating. As  
298 above, we divide the channel into three basic modules: the voltage-sensor domain (VSD), comprising S2-S4,  
299 the pore domain (PD), from S5-S6, and the carboxy terminus, of which the proximal half (up to the end of

300 the B helix) is the site of several regulatory molecules, and so we call it the regulatory domain (RD). We  
301 show models of the VSD, PD and S6Jx based on the co-ordinates of the Kv1.2 channel solved in the  
302 activated/open conformation (Khalili-Araghi et al., 2010). R190 and R195 lie within the S2-S3 linker, which  
303 is part of the VSD; R242 and H257 lie within the PD, and K358 and R364 are within the S6Jx, which our  
304 model predicts also to be in continuous interface with the PD (Figs. 1B, C; K366 and H367 are not  
305 displayed). We did not construct a model of PIP<sub>2</sub> binding to the A-B helix linker, due to the lack of a  
306 suitable template.

307 To model the putative network of interactions of PIP<sub>2</sub> with KCNQ3 channels, we first built structural  
308 models of WT and mutant KCNQ3 channels, and performed PIP<sub>2</sub> docking simulations to the most  
309 energetically favourable WT (Figs. 1D, E) and mutant KCNQ3 models (Fig. 6). It is widely thought that  
310 positively-charged amino acids are mostly responsible for interactions with PIP<sub>2</sub>. Thus, we first simulated  
311 the interaction of PIP<sub>2</sub> in the presence of all available positive charges on the protein in the open  
312 conformation of WT KCNQ3. In the preferred location for PIP<sub>2</sub> binding in the WT KCNQ3 model (Fig. 1E),  
313 the phosphate head-group of PIP<sub>2</sub> is predicted to be directed towards R242 and R243 in the S4-S5 linker and  
314 K358 and K366 in the S6Jx, and also predicted to form hydrogen-bond interactions with the nearby residues  
315 within the same subunit in both the S4-S5 linker and S6Jx (Fig. 1E, residues in blue in Sub-D). Of note, the  
316 acyl tail of PIP<sub>2</sub> is predicted to be directed toward residues in the inner face of S5 (H257) and S6 (F343,  
317 F344, L346, and P347) in the neighbouring subunit (Fig. 1E, residues in orange in Sub-C). Thus, PIP<sub>2</sub>  
318 appears to be cross-linking neighbouring subunits, in analogy with a role for PIP<sub>2</sub> reported for GIRK2  
319 channels (Whorton and MacKinnon, 2011). Taken together, our simulations find that PIP<sub>2</sub> is predicted to  
320 interact with the S4-S5 linker/S6Jx interface (Fig. 1E), suggesting a mechanistic basis for the effect of  
321 mutations in these regions on the favourability for activation; *i.e.*, PIP<sub>2</sub> interactions with the S4-S5  
322 linker/S6Jx interface stabilize, and promote opening.

#### 323 ***Multiple sites of PIP<sub>2</sub> interactions at the VSD-PD interface of mutant KCNQ3 channels***

324 In line with previous studies on KCNQ1 and KCNQ2 channels (Zhang et al., 2013; Eckey et al.,  
325 2014), positively charged residues of the S4-S5 linker (R242 and R243) and S6Jx (K358 and K366) in the  
326 same subunit (Fig. 1E, residues colored in blue), and S5 of the neighboring subunit (H257) (Fig. 1E,  
327 residues colored in orange) are predicted to be involved in the interactions of PIP<sub>2</sub> with WT KCNQ3.  
328 However, our experimental data demonstrate that mainly R190, R242, R243, H257, R364 and H367 are the  
329 determinants of PIP<sub>2</sub> interactions, whereas K358 and K366 did not seem important. Therefore, we used our  
330 model to ask whether these sites are predicted to alter PIP<sub>2</sub> interactions. We analyzed PIP<sub>2</sub> docking  
331 simulations for the following mutants: R190Q, R242A, H257N, R364A, KRK-AAA, H367A, K358A, and  
332 K366A (Fig. 6). Unlike WT KCNQ3, PIP<sub>2</sub> docking simulations of R190Q (Fig. 6A), H257N (Fig. 6C)  
333 R364A (Fig. 6D), H367A (Fig. 6F), and K366A (Fig. 6H) predict a network of interactions mainly with two  
334 positively charged residues of the S4-S5 linker (R242, R243) and one in S6Jx (K358) of the same subunit.  
335 Simulations of KRK-AAA (Fig. 6E) and K358A (Fig. 6G) mutants predict that PIP<sub>2</sub> is docked similarly to  
336 R242 and R243 of the S4-S5 linker, but in those cases stabilize the network of interactions with H257 in S5  
337 of the neighboring subunit. Noteworthy for all these mutants, R242 is predicted as a common residue in the  
338 network of interactions of PIP<sub>2</sub>. Moreover, PIP<sub>2</sub> docking simulations of R242A (Fig. 6B) suggest a network  
339 of interactions with R243 of the S4-S5 linker, and two positively charged residues in S6Jx (H363 and K366).  
340 Moreover, the R242A, H257N and KRK-AAA mutations are predicted to cause major structural  
341 rearrangements in the S4-S5 linker, S5, S6 and S6Jx (Fig. S2). Again, we realize that the experimental data  
342 reported little functional effects of charge neutralization of the K358 and K366 residues that might have  
343 been predicted to stabilize the interactions of PIP<sub>2</sub> with the channels. However, the simulations of PIP<sub>2</sub> with  
344 K358A and K366A (Figs. 6G, H) predict that whereas the orientation of PIP<sub>2</sub> in the inner face of S6Jx is  
345 opposite of that predicted for WT channels, the predicted interactions at residues R242 and H257 are  
346 predicted to preserve coupling to channel gating by maintaining coupling between the S4-S5 linker and the  
347 S6JxA. Alternatively, as stated above, our model may not have such single-residue precision that  
348 corresponds to a transmembrane ion channel *in situ*.

#### 349 ***Additional sites of PIP<sub>2</sub> interactions at the S2-S3 interface with KCNQ3 channels***

350 Given the lack of correlation between PIP<sub>2</sub> interactions and modification of the voltage dependence  
351 of activation observed in our data, we generated additional structural models of KCNQ3 in the closed state  
352  
353



354 using as a template the co-ordinates of the Kv1.2 channel solved in the resting/closed state (Khalili-Araghi  
355 et al., 2010). For the modeled closed KCNQ3 channels, the inositol ring of PIP<sub>2</sub> is predicted to be oriented  
356 towards K103 in S1, R188 in the S2-S3 linker, and R227 and R230 in S4; whereas the acyl tail of PIP<sub>2</sub> is  
357 predicted to form hydrogen bonds with residues in S2 and S4 within the same subunit (Figs. 7A, B, C). To  
358 correlate these predictions with function, we performed additional patch-clamp experiments, assaying the  
359 effect of charge-neutralizing mutations on the apparent PIP<sub>2</sub> affinity of KCNQ3T, again using the Dr-VSP  
360 approach. We found that substitution of these positively charged residues with an alanine significantly  
361 accelerated the rate of decay of the current upon turn-on of Dr-VSP, compared to KCNQ3T. For KCNQ3T,  
362 KCNQ3T-K103A, KCNQ3T-R188A, KCNQ3T-R227A and KCNQ3T-R230A, the rate of decay was  
363 respectively  $0.84 \pm 0.13$  s,  $0.29 \pm 0.05$  s,  $0.48 \pm 0.11$  s,  $0.18 \pm 0.03$  s and  $0.20 \pm 0.03$  s, respectively (n = 5-  
364 11, Fig. 7D). All the point mutants displayed a slower rate of recovery compared to KCNQ3T. We then  
365 wondered if combining the K103A and R188A and the R227A and R230A double mutations would result in  
366 a synergistically greater reduction in apparent PIP<sub>2</sub> affinity than either mutation alone. We found the rate of  
367 current decay upon turn-on of Dr-VSP of KCNQ3T-K103A-R188A to be 2-fold faster ( $0.39 \pm 0.05$  s, n = 11,  
368  $p < 0.05$ ) than that of KCNQ3T channels and intermediate between the K103A ( $0.29 \pm 0.05$  s, n = 7) and  
369 R188A ( $0.48 \pm 0.11$  s, n = 5) mutants, whereas that of the R227A-R230A double mutant was 3-fold faster  
370 ( $0.27 \pm 0.04$  s, n = 8,  $p < 0.01$ ) than that of KCNQ3T, but slower than those from single R227A and R230A  
371 mutants. Finally, both double mutants displayed a slower current recovery after turn-off of Dr-VSP ( $25.4 \pm$   
372  $3.4$  s, n = 11,  $p < 0.05$  and  $28.6 \pm 5.0$  s, n = 8,  $p < 0.01$ ) than KCNQ3T, and quite similar to those from  
373 single mutants. These data suggest that K103 in S1, R188 in the S2-S3 linker as well as R227 and R230 in  
374 S4 play a role in PIP<sub>2</sub> interactions with KCNQ3 but they do not act synergistically. These data are also  
375 consistent with the predictions of our modeling/docking simulations, giving us further confidence in the  
376 accuracy of our modeling. Interestingly, R188 is conserved in KCNQ2 but not in other KCNQ channels,  
377 suggesting that this residue may also interact with PIP<sub>2</sub> in KCNQ2. Unlike R188, R227 is conserved in all  
378 KCNQ channels and may also be critical for PIP<sub>2</sub>-binding to KCNQ1-5 channels.

379

## 380 DISCUSSION

381 In the present work, we investigate the molecular determinants involved in the regulation of KCNQ3  
382 channels by PIP<sub>2</sub>. Many studies have investigated the sites of action of PIP<sub>2</sub> on ion channels, including  
383 voltage-dependent K<sup>+</sup> channels (Kv). However, the location of these sites remains controversial. For  
384 KCNQ2 and KCNQ3 channels, we have previously highlighted critical PIP<sub>2</sub> interaction domains in the A-B  
385 helix linker (Hernandez et al., 2008). Others have identified the S6Jx domain as important for KCNQ1-3  
386 (Peroz et al., 2008; Telezhkin et al., 2013; Zaydman et al., 2013), and our results here are in accord with  
387 those reports. Recent work studying KCNQ1-containing channels has illuminated important PIP<sub>2</sub>-interaction  
388 domains in the S2-S3 and S4-S5 linkers that play a role in coupling to gating (Zaydman et al., 2013;  
389 Zaydman and Cui, 2014; Kasimova et al., 2015). This study is in accord with those findings as well for  
390 KCNQ3, in terms of there being additional domains of PIP<sub>2</sub> interactions. Another recent study suggested  
391 that the voltage dependence of KCNQ2 channels is regulated via PIP<sub>2</sub> interactions with the S2-S3 and S4-S5  
392 linkers (Zhang et al., 2013). We do not find similar results for KCNQ3. Finally, another group recently  
393 suggested that deletion of the A-B linker does not affect the apparent affinity of KCNQ2 for PIP<sub>2</sub> (Aivar et  
394 al., 2012); however, in retrospect, we wonder if the VSP method is well applicable for such low PIP<sub>2</sub>-  
395 affinity channels, given the extremely brief “dwell time” that PIP<sub>2</sub> must have for them, and correspondingly  
396 high  $k_{off}$  rate, especially compared to the rate of PIP<sub>2</sub> dephosphorylation. Finally, the current work here,  
397 studying KCNQ3, is consistent with our earlier studies implicating the importance of A-B linker domain  
398 (Hernandez et al., 2008).

399

### 400 *Comparison of the regions of KCNQ1-3 channels contributing to PIP<sub>2</sub> interactions.*

401 The present work, reporting R364 and H367 mutations of KCNQ3T, corresponding to R325A and  
402 H328C in KCNQ2, to being also highly involved in PIP<sub>2</sub> interactions, is in accord with previous work on  
403 KCNQ2 (Telezhkin et al., 2013; Zhang et al., 2013). For the family of PIP<sub>2</sub>-regulated inward rectifier K<sup>+</sup>  
404 (K<sub>ir</sub>) channels, the JxS6 domain of KCNQ channels is analogous to the C-terminal domain just after M2,  
405 which has long been identified as a hot-spot for PIP<sub>2</sub> interactions by mutagenesis studies (Logothetis et al.,  
406 2007) and confirmed by the solved crystal structure of PIP<sub>2</sub> bound to GIRK2 channels (Whorton and

407 MacKinnon, 2011). Remarkably, our simulation studies predict that PIP<sub>2</sub> is stabilized between neighbouring  
408 subunits in the S6Jx, which is similar to that reported for GIRK2 channels in the similar domain. Hence, we  
409 suppose this structural mechanism to be likely conserved among PIP<sub>2</sub>-regulated channels in general. We  
410 speculate that the dual A&B helices, both containing calmodulin-binding domains, possessed by KCNQ, but  
411 not K<sub>ir</sub>, channels, endow the A-B linker of KCNQ channels as a more unique site of PIP<sub>2</sub> interactions, for  
412 reasons that will likely require more structural studies of these proteins.

413 Although our results here also show PIP<sub>2</sub> interactions with the S2-S3 and S4-S5 linkers in the VSD of  
414 KCNQ3, as for KCNQ1, and that small, yet definite PIP<sub>2</sub>-sensitive and voltage-gated currents are still  
415 produced by KCNQ3T channels mutated to lack interactions with both domains in the C-terminus, we do  
416 not find the interactions with the S2-S3 and S4-S5 linkers to be coupled to modifications of voltage  
417 dependence. Since the work on KCNQ1 channels showed that such linkage to PIP<sub>2</sub> was not via alterations in  
418 the sensitivity of the voltage sensor, but rather to the efficiency of coupling between the voltage sensor and  
419 the gating machinery (Zaydman et al., 2013), we hypothesize that the role of PIP<sub>2</sub> interactions in such  
420 coupling is probably similar in nature between KCNQ1 and KCNQ3, and likely KCNQ2 as well.  
421 Interestingly, a striking difference between KCNQ1-containing channels and KCNQ2-4, is that whereas  
422 currents from the latter are depressed by Ca<sup>2+</sup>/calmodulin, those of the former are enhanced (Gamper and  
423 Shapiro, 2003; Chambard and Ashmore, 2005; Gamper et al., 2005; Shamgar et al., 2006; Zaika et al., 2007;  
424 Kosenko and Hoshi, 2013; Sachyani et al., 2014). Given that both critical PIP<sub>2</sub>-interaction domains in the C-  
425 terminus of KCNQ1-3 channels are very likely to be surrounded by Ca<sup>2+</sup>/calmodulin, we are very interested  
426 to learn the relationship between calmodulin and PIP<sub>2</sub> interactions and voltage-dependent coupling, and the  
427 perhaps subtle yet important differences that confer opposite effects of Ca<sup>2+</sup> loading of calmodulin on the  
428 function of KCNQ1-containing channels, *vs.* KCNQ2-4.

429 The basic residues of both S2-S3 and S4-S5 linkers are highly conserved among KCNQ channels. In our  
430 experiments, K103A, R188A, R190Q, R227A and R230, but not the R195Q or R195A mutations, in S1, the  
431 S2-S3 linker and in S4 induced a decrease of the apparent affinity for PIP<sub>2</sub>. K162 in the S2-S3 linker of  
432 KCNQ2 has been implicated in PIP<sub>2</sub>-channel interactions in the closed state, supported by molecular  
433 dynamics simulations (Zhang et al., 2013). Our PIP<sub>2</sub> docking simulations of KCNQ3 channels also suggest  
434 that PIP<sub>2</sub> interacts with S1 (K103), the S2-S3 linker (R188 and R190) and S4 (R227 and R230) of closed  
435 KCNQ3 channels. In the simulations of KCNQ3 (R188A and R190Q), PIP<sub>2</sub> was predicted to interact with  
436 the S2-S3 linker and to lose inter-subunit contacts, which might favor channel deactivation. As opposed to  
437 previous observations in Shaker and Kv1.2 channels in which the S2-S3 linker has been suggested to  
438 interact with PIP<sub>2</sub> preferentially in the closed state (Abderemane-Ali et al., 2012; Rodriguez-Menchaca et al.,  
439 2012), our experimental results did not show a clear state dependence of KCNQ3/PIP<sub>2</sub> interactions. The  
440 modeling/ docking simulations are consistent with the opening of KCNQ3 channels involving PIP<sub>2</sub>  
441 interactions at the VSD-PD interface, consistent with PIP<sub>2</sub>/KCNQ channel interactions involving a complex  
442 network of basic residues along the VSD-PD interface and the C-terminus that cooperatively favor opening.  
443 They also suggest that a structural mechanism of channel opening involves PIP<sub>2</sub>-mediated inter-subunit  
444 interactions. Interestingly, such PIP<sub>2</sub>-channel interactions have also been described in the crystal structures  
445 of K<sub>ir</sub>2.2 and GIRK2 (K<sub>ir</sub>3.2) channels, corresponding to the S4-S5 linker, pore domain and the C-terminus  
446 in KCNQ channels (Hansen et al., 2011; Whorton and MacKinnon, 2011). Although we do not here find the  
447 involvement of PIP<sub>2</sub> interactions with the S4-S5 linker *per se* to be coupled to voltage dependence of  
448 activation, our electrophysiological data and our homology modeling for KCNQ3 are fully in accord with  
449 S4-S5 linker and S6 to be critical in the coupling between the VSD and the pore domain, as is generally  
450 widely seen for voltage-dependent K<sup>+</sup> channels (Long et al., 2005; Chen et al., 2010; Choveau et al., 2011;  
451 Labro et al., 2011; Zaydman et al., 2013).

452 Since only charge neutralizing mutations in the S4-S5 linker (R242A and H257N) and the S6Jx  
453 (K358A/R364A/K366A), reduced PIP<sub>2</sub> apparent affinity and shifted the voltage dependence of KCNQ3  
454 towards more depolarized potentials, we hypothesize that (i) co-operation between the S4-S5 linker and the  
455 S6Jx stabilizes opening of KCNQ3 and (ii) PIP<sub>2</sub> likely plays a role in this coupling, a hypothesis consistent  
456 with the Kv1.2-2.1 crystal structure in which anionic lipids are bound at the VSD-PD interface of the  
457 channel (Long et al., 2007). However, one central question remains unclear as to generality among K<sup>+</sup>  
458 channels: Does PIP<sub>2</sub> affect the voltage-sensor movement and by that mechanism, the voltage dependence of  
459 Kv channels, or do any effects of PIP<sub>2</sub> on channel voltage dependence generally arise from changes in  
460 coupling between the VSD and the PD? In Kv1.2, replacement of an arginine with a glutamine (R322Q) in

461 the S4-S5 linker, which is involved in VSD-PD coupling, affected the channel voltage dependence of  
462 activation when PIP<sub>2</sub> was depleted. Moreover, gating current experiments showed that PIP<sub>2</sub> affects the VSD  
463 movement of Shaker channels through interactions with the S4-S5 linker (Rodriguez-Menchaca et al., 2012).  
464 However, unlike for Shaker, depletion of PIP<sub>2</sub> does not affect VSD movement of homomeric KCNQ1  
465 (Zaydman et al., 2013). Different labs has come to divergent conclusions about whether PIP<sub>2</sub>-dependent  
466 modulation of KCNQ1-containing channels shifts the voltage dependenc of activation, with one group  
467 positing it does (Loussouarn et al., 2003; Lopes et al., 2005), but another group concluding that it does not  
468 (Li et al., 2011; Zaydman et al., 2013). Our data here are in accord with the latter conclusion in the case of  
469 KCNQ3 channels, consistent with the conclusions for KCNQ2/3 heteromers (Shapiro et al., 2000; Nakajo  
470 and Kubo, 2005; Suh et al., 2006). The presence or absence of KCNE1 subunits is unlikely to alter such  
471 conclusions for KCNQ1, since KCNE1 was shown to have no direct impact on VSD activation or pore  
472 opening, but rather to affect VSD-PD coupling (Zaydman et al., 2014). Consistent with this, a point  
473 mutation (F351A) at the VSD-PD interface had similar effects on KCNQ1 as does inclusion of KCNE1 in  
474 the channel. In that work, both KCNE1 and the F351A mutation abolished the “intermediate-open state” of  
475 KCNQ1-containing channels, promoting the activated-open states of KCNQ1 by increasing its PIP<sub>2</sub> affinity  
476 (Li et al., 2011; Zaydman et al., 2014; Cui, 2016), besides the suppression of inactivation (Hou et al., 2017).  
477 We tentatively conclude PIP<sub>2</sub> to not contribute generally to the voltage-dependence of all KCNQ channels,  
478 including KCNQ1, as we found for KCNQ3, but more much more likely to the efficiency of VSD-PD  
479 coupling. We suspect, but cannot at this point provide evidence, for the underlying reason being the display  
480 of two distinct open states of all KCNQ channels (Selyanko and Brown, 1999; Zaydman and Cui, 2014),  
481 leading to state transitions, and PIP<sub>2</sub> actions on voltage dependence, differing from those of other Kv  
482 channels.

483 Although, we now are in accord with four distinct regions of KCNQ1-3 channels interacting with PIP<sub>2</sub>,  
484 we cannot rule out yet additional PIP<sub>2</sub>-binding sites. The distal C-terminus contains basic residues that are  
485 conserved in all KCNQ channels, which may also contribute to PIP<sub>2</sub>. Our experments show that the triplet of  
486 lysines (K531, K532 and K533) located at the end of the B-helix of KCNQ3 do not interact with PIP<sub>2</sub>.  
487 However, R539 and R555 located in the distal C-terminus of KCNQ1 (within the C-helix) were reported to  
488 decrease the affinity of the channel to DiC8-PIP<sub>2</sub> (Park et al., 2005), and K526, K527, K528 have been  
489 identified as a critical 5<sup>th</sup> site where CaM competes with PIP<sub>2</sub> to stabilize the open state of KCNQ1-  
490 containing channels (Tobelaim et at., 2017a, b). The possibility of other PIP<sub>2</sub> interacting sites on the distal  
491 C-terminus region is intriguing, given the location of the site of phosphorylation of KCNQ3 channels by  
492 protein kinase C (PKC) (Hoshi et al., 2003) since such phosphorylation would add a counter-acting negative  
493 charge at that locus. This could be a “hot-spot” of PIP<sub>2</sub>/PKC cross talk, both of which being affected by  
494 stimulation of G<sub>q</sub>-coupled receptors. Such a highly-intriguing possibility needs to be carefully examined for  
495 all KCNQ2-4 channels, as well as KCNQ2/3 heteromers that underlie most M-type K<sup>+</sup> currents in the  
496 nervous system.

497

## 498 **MATERIALS AND METHODS**

499

### 500 ***Cell culture and Transfection***

501 Chinese hamster ovary (CHO) cells were grown in 100-mm tissue-culture dishes (Falcon, Franklin  
502 Lakes, NJ) in DMEM medium with 10% heat-inactivated fetal bovine serum plus 0.1%  
503 penicillin/streptomycin in a humidified incubator at 37°C (5% CO<sub>2</sub>) and passaged every 4 days. Cells were  
504 discarded after ~30 passages. For patch-clamp and the total internal reflection fluorescent (TIRF)  
505 experiments, CHO cells were first passaged onto 35 mm plastic tissue culture dishes and transfected 24h  
506 later with FuGENE HD reagent (Promega), according to the manufacturer's instructions. The next day, cells  
507 were plated onto cover glass chips, and experiments were performed over the following 1-2 days.

### 508 ***Perforated-patch electrophysiology***

509 Pipettes were pulled from borosilicate glass capillaries (1B150F-4, World Precision Instruments) using a  
510 Flaming/Brown micropipette puller P-97 (Sutter Instruments), and had resistances of 2-4 MΩ when filled  
511 with internal solution and measured in standard bath solution. Membrane current was measured with pipette  
512 and membrane capacitance cancellation, sampled at 5 ms and filtered at 500 Hz by means of an EPC9  
513 amplifier and PULSE software (HEKA/Instrutech). In all experiments, the perforated-patch method of

514 recording was used with amphotericin B (600 ng/ml) in the pipette (Rae et al., 1991). Amphotericin was  
515 prepared as a stock solution as 60 mg/ml in DMSO. In these experiments, the access resistance was typically  
516 7-10 MΩ 5-10 min after seal formation. Cells were placed in a 500 μl perfusion chamber through which  
517 solution flowed at 1-2 ml/min. Inflow to the chamber was by gravity from several reservoirs, selectable by  
518 activation of solenoid valves (Warner Scientific). Bath solution exchange was essentially complete by <30 s.  
519 Experiments were performed at room temperature.

520 Currents were studied by holding the membrane potential at -80 mV, and applying 800 ms  
521 depolarizing pulses from 60 mV to -80 mV, every 3 s. KCNQ-current amplitude was measured at 60 mV.  
522 To estimate voltage dependence, tail current amplitudes were measured ~20 ms after the repolarization at -  
523 60 mV, normalized, and plotted as a function of test potential. The data were fit with Boltzmann relations of  
524 the form:  $I/I_{\max} = I_{\max} / \{1 + \exp[(V_{1/2} - V)/k]\}$ , where  $I_{\max}$  is the maximum tail current,  $V_{1/2}$  is the voltage that  
525 produces half-maximal activation of the conductance and  $k$  is the slope factor. Cell populations were  
526 compared using a two tailed t-test. To evaluate the apparent affinity of wild-type and mutant KCNQ3T  
527 channels for PIP<sub>2</sub>, we used the Dr-VSP cloned into the pIRES-EGFP bicistronic vector, so that transfected  
528 cells would express more copies of Dr-VSP than of EGFP. The cells patched were chosen based on their  
529 visible EGFP fluorescence as previously described (Falkenburger et al., 2010). Current decay was measured  
530 at 120 mV, normalized, and plotted as a function of time. Recovery of the current was quantified at 30 mV  
531 or 0 mV (which is negative to activation of Dr-VSP) after depolarization to 120 mV or 100 mV. The rate of  
532 current recovery was quantified with a single exponential fit as previously described which we realize is an  
533 approximation due to the confound of the known rate of PI(4)P-5 kinase ( $\tau \sim 10$  s at RT) (Falkenburger et al.,  
534 2010), and the rate of current decay quantified ~ 30 ms after the activation of Dr-VSP at 120 mV with single  
535 exponential fits. Finally, the steady-state inhibition of the current by Dr-VSP was quantified by comparing  
536 current at 30 mV or 0 mV before and after activation of Dr-VSP. Data are given as the mean  $\pm$  S.E.M.

537 The external Ringer's solution used to record KCNQ currents in CHO cells contained (in mM): 160  
538 NaCl, 5 KCl, 2 CaCl<sub>2</sub>, 1 MgCl<sub>2</sub> and 10 HEPES, pH 7.4 with NaOH. The pipette solution contained (in mM):  
539 160 KCl, 5 MgCl<sub>2</sub> and 10 HEPES, pH 7.4 with KOH with added amphotericin B (600 ng/ml).

540

#### 541 **Total Internal Reflection Fluorescence (TIRF) microscopy**

542 Fluorescence emission from enhanced yellow fluorescent protein (YFP)-tagged KCNQ3T and KCNQ3T  
543 mutants (R190Q, R242A, H257N, R364A, KRK-AAA, H367C, Δ linker and RH-AC/Δ linker) were  
544 collected at room temperature using TIRF (also called evanescent field) microscopy. Total internal reflection  
545 fluorescence generates evanescent field illumination normal to the interface between two media of differing  
546 refractive indices, the cover glass and water in this case, that declines exponentially with distance,  
547 illuminating only a thin section (300 nm) of the cell very near the cover glass, including the plasma  
548 membrane (Axelrod, 2003). All TIRF experiments were performed on a Nikon TE2000 microscope mated to  
549 a Prairie Technologies laser launch delivery system, as previously described (Bal et al., 2008). Images were  
550 not binned or filtered, with a pixel size corresponding to a square of 122 × 122 nm. The reader should know  
551 that this system has now been very significantly upgraded.

552

#### 553 **Structural homology, simulation and docking models.**

554 The human KCNQ3 channel sequence in FASTA format (uniprot ID O43525) was loaded into Swiss-  
555 PdbViewer 4.10 (Schwede et al., 2003) for template searching against the ExPDB database (ExpASY,  
556 <http://www.expasy.org/>). Then, the structural model for the full length of the *Rattus norvegicus* voltage-  
557 gated K<sup>+</sup> channel subfamily A member 2 (Kv1.2; PDB: 3LUT) (Chen et al., 2010) was identified as the best  
558 template. The initial sequence alignments between the KCNQ3 channel and Kv1.2 were generated with full-  
559 length pairwise alignments using ClustalW (Thompson et al., 1994). Sequence alignments were inspected  
560 manually to assure accuracy among structural domains solved from the template. Since the turret domain of  
561 the KCNQ3 subunit was absent in the solved Kv1.2 structure, residues 287-296 were excluded from the  
562 modeling. The A315T pore mutation was also omitted from the template as, it does not change the apparent  
563 PIP<sub>2</sub> affinity of the channel (Hernandez et al., 2009). Full-length multiple alignments were submitted for  
564 automated comparative protein modelling implemented in the program suite incorporated in SWISS-  
565 MODEL (<http://swissmodel.expasy.org/SWISS-MODEL.html>).

566 Before energy minimization using GROMOS96 (Schuler et al., 2001), the resulting structural models of  
567 KCNQ3 subunits were manually inspected, the structural alignments confirmed and evaluated for proper H-

568 bonds and the presence of clashes and missing atoms using estimated using Molegro Molecular Viewer  
569 (www.clcbio.com). Further structural models were generated by rearrangement of four KCNQ3 subunit  
570 models as a tetramer. Coordinates of the Kv1.2 channel in the resting/closed and activated/open states  
571 (Khalili-Araghi et al., 2010) were used to model the KCNQ3 channel in both forms. The calculated energies  
572 for the corresponding KCNQ3 open and closed stated structural models were highly favourable (-35,580  
573 KJ/mol and -27,656 KJ/mol, respectively). Neighbourhood structural conformational changes caused by the  
574 introduction of single point mutations of the KCNQ3 structure were simulated using Rosetta 3.1 (Smith and  
575 Kortemme, 2008), and implemented in the program suite incorporated in Rosetta Backrub  
576 (<https://kortemmelab.ucsf.edu>). As Rosetta 3.1 does not allow cysteine substitutions, KCNQ3 subunits (WT  
577 or mutant) with cysteines were exchanged for alanines. Simulations for single point mutations were carried  
578 out for dimers, for which identical mutations were presented in neighboring subunits, excluding distal  
579 residues of the C-terminus (404-557).

580 Up to twenty of the best-scoring structures were generated at each time by choosing parameters  
581 recommended by the application. The root-mean square (RMS) deviation was calculated between the WT  
582 structures and superimposed on the simulated mutant structures. For each mutation, the RMS average over  
583 ten low energy structures was computed and conformational changes displayed among neighboring  
584 structural domains considered significant for values of RMS > 0.5 Å. PatchDock (Schneidman-Duhovny et  
585 al., 2005), a molecular docking algorithm based on shape complementarity principles, was used to dock PIP<sub>2</sub>  
586 with proposed interacting domains at the interfaces of dimers homology models based upon the Kv1.2  
587 structure. One PIP<sub>2</sub> ligand was simulated docked per subunit, with the structure of PIP<sub>2</sub> used as in the solved  
588 PIP<sub>2</sub>-bound structure of Kv2.2 (Hansen et al., 2011). PatchDock was implemented using an algorithm  
589 applied for protein-small ligand docking with a default clustering of 1.5 Å of the RMS as recommended.  
590 Before the simulation, a list of residues for three predicted binding sites for PIP<sub>2</sub> in the docking site was  
591 derived, as indicated by functional studies, which included domains within the S2-S3 and S4-S5 linkers, and  
592 the proximal C-terminus. Twenty solutions for the first and the fifth best-scoring simulated mutant were  
593 ranked according to the geometric shape complementarity score and the atomic contact energy (-171  
594 kcal/mol and -243 kcal/mol for the open and closed states, respectively) (Zhang et al., 1997), and inspected  
595 manually to assure accuracy among representative orientations of bound PIP<sub>2</sub>. The energy electrostatic  
596 interactions for a given docking pose (ligand-protein complex) were analysed using the ligand energy  
597 inspector implemented through the Molegro Molecular viewer. The short-range electrostatic interactions ( $r$   
598 < 6 Å) between the PIP<sub>2</sub> and residues in WT or mutant were computed and the lowest solutions among the  
599 highest geometric score and the right orientation represented here. We prepared the modeling figures using  
600 Chimera 1.7 (Pettersen et al., 2004).

601

#### 602 **ACKNOWLEDGMENTS**

603 All authors declare that there is no conflict of interest. We gratefully acknowledge the assistance of Pamela  
604 Reed, Maryann Hobbs and Isamar Sanchez in this work. We also thank Nikita Gamper and Crystal Archer  
605 for useful discussions. This work was supported by National Institutes of Health grants R01 NS150305,  
606 R01 NS094461 and R56 NS153503 to M.S.S.

607 **REFERENCES**

- 608 Abderemane-Ali, F., Z. Es-Salah-Lamoureaux, L. Delemotte, M.A. Kasimova, A.J. Labro, D.J. Snyders, D.  
609 Fedida, M. Tarek, I. Baro, and G. Loussouarn. 2012. Dual effect of phosphatidylinositol (4,5)-  
610 bisphosphate PIP<sub>2</sub> on Shaker K<sup>+</sup> channels. *Journal of Biological Chemistry*. 287:36158-36167.
- 611 Aivar, P., J. Fernandez-Orth, C. Gomis-Perez, A. Alberdi, A. Alaimo, M.S. Rodriguez, T. Giraldez, P.  
612 Miranda, P. Areso, and A. Villarroel. 2012. Surface expression and subunit specific control of steady  
613 protein levels by the Kv7.2 helix A-B linker. *PLoS One*. 7:e47263.
- 614 Axelrod, D. 2003. Total internal reflection fluorescence microscopy in cell biology. *Methods in Enzymology*.  
615 361:1-33.
- 616 Bal, M., J. Zhang, O. Zaika, C.C. Hernandez, and M.S. Shapiro. 2008. Homomeric and heteromeric  
617 assembly of KCNQ (Kv7) K<sup>+</sup> channels assayed by total internal reflection fluorescence/fluorescence  
618 resonance energy transfer and patch clamp analysis. *Journal of Biological Chemistry*. 283:30668-  
619 30676.
- 620 Bender, K., M.C. Wellner-Kienitz, and L. Pott. 2002. Transfection of a phosphatidyl-4-phosphate 5-kinase  
621 gene into rat atrial myocytes removes inhibition of GIRK current by endothelin and alpha-adrenergic  
622 agonists. *FEBS letters*. 529:356-360.
- 623 Boyer, S.B., and P.A. Slesinger. 2010. Probing novel GPCR interactions using a combination of FRET and  
624 TIRF. *Communicative & Integrative Biology*. 3:343-346.
- 625 Chambard, J.M., and J.F. Ashmore. 2005. Regulation of the voltage-gated potassium channel KCNQ4 in the  
626 auditory pathway. *Pflugers Archiv*. 450:34-44.
- 627 Chen, X., Q. Wang, F. Ni, and J. Ma. 2010. Structure of the full-length Shaker potassium channel Kv1.2 by  
628 normal-mode-based X-ray crystallographic refinement. *Proceedings of the National Academy of  
629 Sciences*. 107:11352-11357.
- 630 Choveau, F.S., C.C. Hernandez, S.M. Bierbower, and M.S. Shapiro. 2012. Pore determinants of KCNQ3 K<sup>+</sup>  
631 current expression. *Biophysical Journal*. 102:2489-2498.
- 632 Choveau, F.S., N. Rodriguez, F. Abderemane Ali, A.J. Labro, T. Rose, S. Dahimene, H. Boudin, C. Le  
633 Henaff, D. Escande, D.J. Snyders, F. Charpentier, J. Merot, I. Baro, and G. Loussouarn. 2011.  
634 KCNQ1 channels voltage dependence through a voltage-dependent binding of the S4-S5 linker to the  
635 pore domain. *Journal of Biological Chemistry*. 286:707-716.
- 636 Cui, J. 2016. Voltage-Dependent Gating: Novel Insights from KCNQ1 Channels. *Biophysical Journal*.  
637 110:14-25.
- 638 Eckey, K., E. Wrobel, N. Strutz-Seebohm, L. Pott, N. Schmitt, and G. Seebohm. 2014. Novel Kv7.1-  
639 phosphatidylinositol 4,5-bisphosphate interaction sites uncovered by charge neutralization scanning.  
640 *Journal of Biological Chemistry*. 289:22749-22758.
- 641 Falkenburger, B.H., J.B. Jensen, and B. Hille. 2010. Kinetics of PIP<sub>2</sub> metabolism and KCNQ2/3 channel  
642 regulation studied with a voltage-sensitive phosphatase in living cells. *Journal of General  
643 Physiology*. 135:99-114.
- 644 Gamper, N., Y. Li, and M.S. Shapiro. 2005. Structural requirements for differential sensitivity of KCNQ K<sup>+</sup>  
645 channels to modulation by Ca<sup>2+</sup>/calmodulin. *Molecular Biology of the Cell*. 16:3538-3551.
- 646 Gamper, N., and M.S. Shapiro. 2003. Calmodulin mediates Ca<sup>2+</sup>-dependent modulation of M-type K<sup>+</sup>  
647 channels. *Journal of General Physiology*. 122:17-31.
- 648 Gamper, N., and M.S. Shapiro. 2007. Regulation of ion transport proteins by membrane phosphoinositides.  
649 *Nature Reviews Neuroscience*. 8:921-934.
- 650 Gamper, N., O. Zaika, Y. Li, P. Martin, C.C. Hernandez, M.R. Perez, A.Y. Wang, D.B. Jaffe, and M.S.  
651 Shapiro. 2006. Oxidative modification of M-type K<sup>+</sup> channels as a mechanism of cytoprotective  
652 neuronal silencing. *EMBO journal*. 25:4996-5004.
- 653 Hansen, S.B., X. Tao, and R. MacKinnon. 2011. Structural basis of PIP<sub>2</sub> activation of the classical inward  
654 rectifier K<sup>+</sup> channel Kir2.2. *Nature*. 477:495-498.
- 655 Hernandez, C.C., B. Falkenburger, and M.S. Shapiro. 2009. Affinity for phosphatidylinositol 4,5-  
656 bisphosphate determines muscarinic agonist sensitivity of Kv7 K<sup>+</sup> channels. *Journal of General  
657 Physiology*. 134:437-448.

- 658 Hernandez, C.C., O. Zaika, and M.S. Shapiro. 2008. A carboxy-terminal inter-helix linker as the site of  
659 phosphatidylinositol 4,5-bisphosphate action on Kv7 (M-type) K<sup>+</sup> channels. *Journal of General*  
660 *Physiology*. 132:361-381.
- 661 Hoshi, N., J.S. Zhang, M. Omaki, T. Takeuchi, S. Yokoyama, N. Wanaverbecq, L.K. Langeberg, Y. Yoneda,  
662 J.D. Scott, D.A. Brown, and H. Higashida. 2003. AKAP150 signaling complex promotes suppression  
663 of the M-current by muscarinic agonists. *Nature Neuroscience*. 6:564-571.
- 664 Hou, P., J. Eldstrom, J. Shi, L. Zhong, K. McFarland, Y. Gao, D. Fedida, and J. Cui. 2017. Inactivation of  
665 KCNQ1 potassium channels reveals dynamic coupling between voltage sensing and pore opening.  
666 *Nature Communications*. 8:1730.
- 667 Itsuki, K., Y. Imai, Y. Okamura, K. Abe, R. Inoue, and M.X. Mori. 2012. Voltage-sensing phosphatase  
668 reveals temporal regulation of TRPC3/C6/C7 channels by membrane phosphoinositides. *Channels*.  
669 6:206-209.
- 670 Jentsch, T.J. 2000. Neuronal KCNQ potassium channels: physiology and role in disease. *Nature Reviews*  
671 *Neuroscience*. 1:21-30.
- 672 Kasimova, M.A., M.A. Zaydman, J. Cui, and M. Tarek. 2015. PIP<sub>2</sub>-dependent coupling is prominent in  
673 Kv7.1 due to weakened interactions between S4-S5 and S6. *Scientific Reports*. 5:7474.
- 674 Khalili-Araghi, F., V. Jogini, V. Yarov-Yarovoy, E. Tajkhorshid, B. Roux, and K. Schulten. 2010.  
675 Calculation of the gating charge for the Kv1.2 voltage-activated potassium channel. *Biophysical*  
676 *journal*. 98:2189-2198.
- 677 Kosenko, A., and N. Hoshi. 2013. A change in configuration of the calmodulin-KCNQ channel complex  
678 underlies Ca<sup>2+</sup>-dependent modulation of KCNQ channel activity. *PLoS one*. 8:e82290.
- 679 Kruse, M., G.R. Hammond, and B. Hille. 2012. Regulation of voltage-gated potassium channels by  
680 PI(4,5)P<sub>2</sub>. *Journal of general physiology*. 140:189-205.
- 681 Labro, A.J., I.R. Boulet, F.S. Choveau, E. Mayeur, T. Bruyns, G. Loussouarn, A.L. Raes, and D.J. Snyders.  
682 2011. The S4-S5 linker of KCNQ1 channels forms a structural scaffold with the S6 segment  
683 controlling gate closure. *Journal of Biological Chemistry*. 286:717-725.
- 684 Li, Y., N. Gamper, D.W. Hilgemann, and M.S. Shapiro. 2005. Regulation of Kv7 (KCNQ) K<sup>+</sup> channel open  
685 probability by phosphatidylinositol 4,5-bisphosphate. *Journal of Neuroscience*. 25:9825-9835.
- 686 Li, Y., M.A. Zaydman, D. Wu, J. Shi, M. Guan, B. Virgin-Downey, and J. Cui. 2011. KCNE1 enhances  
687 phosphatidylinositol 4,5-bisphosphate (PIP<sub>2</sub>) sensitivity of IKs to modulate channel activity.  
688 *Proceedings of the National Academy of Sciences*. 108:9095-9100.
- 689 Logothetis, D.E., T. Jin, D. Lupyran, and A. Rosenhouse-Dantsker. 2007. Phosphoinositide-mediated gating  
690 of inwardly rectifying K<sup>+</sup> channels. *Pflugers Archiv : European Journal of Physiology*. 455:83-95.
- 691 Long, S.B., E.B. Campbell, and R. Mackinnon. 2005. Voltage sensor of Kv1.2: structural basis of  
692 electromechanical coupling. *Science*. 309:903-908.
- 693 Long, S.B., X. Tao, E.B. Campbell, and R. MacKinnon. 2007. Atomic structure of a voltage-dependent K<sup>+</sup>  
694 channel in a lipid membrane-like environment. *Nature*. 450:376-382.
- 695 Lopes, C.M., T. Rohacs, G. Czirjak, T. Balla, P. Enyedi, and D.E. Logothetis. 2005. PIP<sub>2</sub> hydrolysis  
696 underlies agonist-induced inhibition and regulates voltage gating of two-pore domain K<sup>+</sup> channels.  
697 *Journal of Physiology*. 564:117-129.
- 698 Loussouarn, G., K.H. Park, C. Bellocq, I. Baro, F. Charpentier, and D. Escande. 2003. Phosphatidylinositol-  
699 4,5-bisphosphate, PIP<sub>2</sub>, controls KCNQ1/KCNE1 voltage-gated potassium channels: a functional  
700 homology between voltage-gated and inward rectifier K<sup>+</sup> channels. *EMBO Journal*. 22:5412-5421.
- 701 Murata, Y., and Y. Okamura. 2007. Depolarization activates the phosphoinositide phosphatase Ci-VSP, as  
702 detected in *Xenopus* oocytes coexpressing sensors of PIP<sub>2</sub>. *Journal of Physiology*. 583:875-889.
- 703 Nakajo, K., and Y. Kubo. 2005. Protein kinase C shifts the voltage dependence of KCNQ/M channels  
704 expressed in *Xenopus* oocytes. *Journal of Physiology*. 569:59-74.
- 705 Park, K.H., J. Piron, S. Dahimene, J. Merot, I. Baro, D. Escande, and G. Loussouarn. 2005. Impaired  
706 KCNQ1-KCNE1 and phosphatidylinositol-4,5-bisphosphate interaction underlies the long QT  
707 syndrome. *Circulation Research*. 96:730-739.
- 708 Peroz, D., N. Rodriguez, F. Choveau, I. Baro, J. Merot, and G. Loussouarn. 2008. Kv7.1 (KCNQ1)  
709 properties and channelopathies. *Journal of Physiology*. 586:1785-1789.

- 710 Pettersen, E.F., T.D. Goddard, C.C. Huang, G.S. Couch, D.M. Greenblatt, E.C. Meng, and T.E. Ferrin. 2004.  
711 UCSF Chimera--a visualization system for exploratory research and analysis. *Journal of*  
712 *Computational Chemistry*. 25:1605-1612.
- 713 Rae, J., K. Cooper, P. Gates, and M. Watsky. 1991. Low access resistance perforated patch recordings using  
714 amphotericin B. *Journal of Neuroscience Methods*. 37:15-26.
- 715 Rodriguez-Menchaca, A.A., S.K. Adney, Q.Y. Tang, X.Y. Meng, A. Rosenhouse-Dantsker, M. Cui, and  
716 D.E. Logothetis. 2012. PIP<sub>2</sub> controls voltage-sensor movement and pore opening of Kv channels  
717 through the S4-S5 linker. *Proceedings of the National Academy of Sciences*. 109:E2399-2408.
- 718 Sachyani, D., M. Dvir, R. Strulovich, G. Tria, W. Tobelaim, A. Peretz, O. Pongs, D. Svergun, B. Attali, and  
719 J.A. Hirsch. 2014. Structural basis of a Kv7.1 potassium channel gating module: studies of the  
720 intracellular c-terminal domain in complex with calmodulin. *Structure*. 22:1582-1594.
- 721 Schneidman-Duhovny, D., Y. Inbar, R. Nussinov, and H.J. Wolfson. 2005. PatchDock and SymmDock:  
722 servers for rigid and symmetric docking. *Nucleic Acids Research*. 33:W363-367.
- 723 Schuler, L.D., X. Daura, and W.F. Van Gunsteren. 2001. An improved GROMOS96 force field for aliphatic  
724 hydrocarbons in the condensed phase. *Journal of computational chemistry*. 22:1205-1218.
- 725 Schwede, T., J. Kopp, N. Guex, and M.C. Peitsch. 2003. SWISS-MODEL: An automated protein homology-  
726 modeling server. *Nucleic Acids Research*. 31:3381-3385.
- 727 Selyanko, A.A., and D.A. Brown. 1999. M-channel gating and simulation. *Biophysical journal*. 77:701-713.
- 728 Shamgar, L., L. Ma, N. Schmitt, Y. Haitin, A. Peretz, R. Wiener, J. Hirsch, O. Pongs, and B. Attali. 2006.  
729 Calmodulin is essential for cardiac IKS channel gating and assembly: impaired function in long-QT  
730 mutations. *Circulation Research*. 98:1055-1063.
- 731 Shapiro, M.S., J.P. Roche, E.J. Kaftan, H. Cruzblanca, K. Mackie, and B. Hille. 2000. Reconstitution of  
732 muscarinic modulation of the KCNQ2/KCNQ3 K<sup>+</sup> channels that underlie the neuronal M current.  
733 *Journal of Neuroscience*. 20:1710-1721.
- 734 Smith, C.A., and T. Kortemme. 2008. Backrub-like backbone simulation recapitulates natural protein  
735 conformational variability and improves mutant side-chain prediction. *Journal of Molecular Biology*.  
736 380:742-756.
- 737 Suh, B.C., and B. Hille. 2002. Recovery from muscarinic modulation of M current channels requires  
738 phosphatidylinositol 4,5-bisphosphate synthesis. *Neuron*. 35:507-520.
- 739 Suh, B.C., T. Inoue, T. Meyer, and B. Hille. 2006. Rapid chemically induced changes of PtdIns(4,5)P<sub>2</sub> gate  
740 KCNQ ion channels. *Science*. 314:1454-1457.
- 741 Telezhkin, V., J.M. Reilly, A.M. Thomas, A. Tinker, and D.A. Brown. 2012. Structural requirements of  
742 membrane phospholipids for M-type potassium channel activation and binding. *Journal of Biological*  
743 *Chemistry*. 287:10001-10012.
- 744 Telezhkin, V., A.M. Thomas, S.C. Harmer, A. Tinker, and D.A. Brown. 2013. A basic residue in the  
745 proximal C-terminus is necessary for efficient activation of the M-channel subunit Kv7.2 by  
746 PI(4,5)P<sub>2</sub>. *Pflugers Archiv*. 465:945-953.
- 747 Thomas, A.M., S.C. Harmer, T. Khambra, and A. Tinker. 2011. Characterization of a binding site for  
748 anionic phospholipids on KCNQ1. *Journal of Biological Chemistry*. 286:2088-2100.
- 749 Thompson, J.D., D.G. Higgins, and T.J. Gibson. 1994. CLUSTAL W: improving the sensitivity of  
750 progressive multiple sequence alignment through sequence weighting, position-specific gap penalties  
751 and weight matrix choice. *Nucleic Acids Research*. 22:4673-4680.
- 752 Tobelaim, W.S., M. Dvir, G. Lebel, M. Cui, T. Buki, A. Peretz, M. Marom, Y. Haitin, D.E. Logothetis, J.A.  
753 Hirsch, and B. Attali. 2017a. Ca<sup>2+</sup>-calmodulin and PIP<sub>2</sub> interactions at the proximal C-terminus of  
754 Kv7 channels. *Channels*. 11:686-695.
- 755 Tobelaim, W.S., M. Dvir, G. Lebel, M. Cui, T. Buki, A. Peretz, M. Marom, Y. Haitin, D.E. Logothetis, J.A.  
756 Hirsch, and B. Attali. 2017b. Competition of calcified calmodulin N lobe and PIP<sub>2</sub> to an LQT  
757 mutation site in Kv7.1 channel. *Proceedings of the National Academy of Sciences*. 114:E869-e878.
- 758 Whorton, M.R., and R. MacKinnon. 2011. Crystal structure of the mammalian GIRK2 K<sup>+</sup> channel and  
759 gating regulation by G proteins, PIP<sub>2</sub>, and sodium. *Cell*. 147:199-208.
- 760 Winks, J.S., S. Hughes, A.K. Filippov, L. Tatulian, F.C. Abogadie, D.A. Brown, and S.J. Marsh. 2005.  
761 Relationship between membrane phosphatidylinositol-4,5-bisphosphate and receptor-mediated  
762 inhibition of native neuronal M channels. *Journal of Neuroscience*. 25:3400-3413.



- 763 Zaika, O., C.C. Hernandez, M. Bal, G.P. Tolstykh, and M.S. Shapiro. 2008. Determinants within the turret  
764 and pore-loop domains of KCNQ3 K<sup>+</sup> channels governing functional activity. *Biophysical journal*.  
765 95:5121-5137.
- 766 Zaika, O., G.P. Tolstykh, D.B. Jaffe, and M.S. Shapiro. 2007. Inositol triphosphate-mediated Ca<sup>2+</sup> signals  
767 direct purinergic P2Y receptor regulation of neuronal ion channels. *Journal of Neuroscience*.  
768 27:8914-8926.
- 769 Zaydman, M.A., and J. Cui. 2014. PIP<sub>2</sub> regulation of KCNQ channels: biophysical and molecular  
770 mechanisms for lipid modulation of voltage-dependent gating. *Frontiers in Physiology*. 5:195.
- 771 Zaydman, M.A., M.A. Kasimova, K. McFarland, Z. Beller, P. Hou, H.E. Kinser, H. Liang, G. Zhang, J. Shi,  
772 M. Tarek, and J. Cui. 2014. Domain-domain interactions determine the gating, permeation,  
773 pharmacology, and subunit modulation of the IKs ion channel. *eLife*. 3:e03606.
- 774 Zaydman, M.A., J.R. Silva, K. Delaloye, Y. Li, H. Liang, H.P. Larsson, J. Shi, and J. Cui. 2013. Kv7.1 ion  
775 channels require a lipid to couple voltage sensing to pore opening. *Proceedings of the National  
776 Academy of Sciences*. 110:13180-13185.
- 777 Zhang, C., G. Vasmatzis, J.L. Cornette, and C. DeLisi. 1997. Determination of atomic desolvation energies  
778 from the structures of crystallized proteins. *Journal of Molecular Biology*. 267:707-726.
- 779 Zhang, H., L.C. Craciun, T. Mirshahi, T. Rohacs, C.M. Lopes, T. Jin, and D.E. Logothetis. 2003. PIP<sub>2</sub>  
780 activates KCNQ channels, and its hydrolysis underlies receptor-mediated inhibition of M currents.  
781 *Neuron*. 37:963-975.
- 782 Zhang, J., M. Bal, S. Bierbower, O. Zaika, and M.S. Shapiro. 2011. AKAP79/150 signal complexes in G-  
783 protein modulation of neuronal ion channels. *Journal of Neuroscience*. 31:7199-7211.
- 784 Zhang, Q., P. Zhou, Z. Chen, M. Li, H. Jiang, Z. Gao, and H. Yang. 2013. Dynamic PIP<sub>2</sub> interactions with  
785 voltage sensor elements contribute to KCNQ2 channel gating. *Proceedings of the National Academy  
786 of Sciences*. 110:20093-20098.
- 787 Zhou, P., H. Yu, M. Gu, F.J. Nan, Z. Gao, and M. Li. 2013. Phosphatidylinositol 4,5-bisphosphate alters  
788 pharmacological selectivity for epilepsy-causing KCNQ potassium channels. *Proceedings of the  
789 National Academy of Science*. 110:8726-8731.

## 790 FIGURE LEGENDS

### 791 **Figure 1. Location of the site(s) of PIP<sub>2</sub> action on KCNQ3 channels.**

792 (A) Sequence alignments of human KCNQ channels of the putative PIP<sub>2</sub> interaction-domains studied in this  
793 work. The residues highlighted in red are conserved basic residues across all KCNQ channels. Structural  
794 domains where the putative PIP<sub>2</sub>-interacting residues are located are indicated below the alignments as solid  
795 lines ( $\alpha$ -helices) and non-continuous lines (linkers). (B, C) 3D structural models of the open conformation of  
796 the KCNQ3 channel in ribbon representation, coloured by subunits as viewed from the membrane plane (B)  
797 and the intracellular side (C). Conserved basic residues R190, R195, R242, H257, K358, and R364 tested in  
798 this study by mutagenesis are shown in gray and mapped onto the channel. (D) Ribbon representations of the  
799 arrangement of the VSD-PD interface of a structural subunit model viewed from the outer and inner side  
800 (upper panels), and membrane plane (bottom panels). The secondary structure of the channels is colored  
801 according to structural domain, as indicated. Side chains of basic residues involved in PIP<sub>2</sub> interactions are  
802 in color, according to structural domain (grey for the S2-S3 linker and S6Jx, and purple for the S4-S5 linker).  
803 The PIP<sub>2</sub> molecule is shown in molecular surface representation within the docking cavity. (E) Expanded  
804 view of the most favourable binding model of PIP<sub>2</sub> in the open conformation. Panels show two neighboring  
805 subunits (Sub) forming the VSD-PD interface (Sub-C and Sub-D). The docking site enclosed in a red box  
806 was enlarged for clarity. In stick representation are the residues forming hydrogen bonds and electrostatic  
807 interactions within the interaction site. Residues in blue from the Sub-D enclose the phosphate groups of  
808 PIP<sub>2</sub>, and residues in orange from the Sub-C enclose the acyl tail of the PIP<sub>2</sub> between sub-C and Sub-D at  
809 the S6Jx. The following are the favorable interactions (label in red) predicted to be in the PIP<sub>2</sub>-docking-  
810 network ( $< 6.0 \text{ \AA}$ , kJ/M): R242 = -12.26, R243 = -4.60, H257 = -1.10, K358 = -4.28, K366 = -5.74.  
811 Hydrogen bonds are not shown.

812

### 813 **Figure 2. Effects of charge neutralizing mutations located in the S2-S3 and S4-S5 linkers on KCNQ3T channels.**

814 (A) Representative perforated patch-clamp recordings from CHO cells transfected with KCNQ3T or the  
815 indicated mutant channels. (B) Bars show summarized current densities at 60 mV for the indicated channels  
816 ( $n = 6-19$ ). (C) Voltage dependence of activation of the tail currents at -60 mV, plotted as a function of test  
817 potential ( $n = 5-19$ ). (D) Representative perforated patch-clamp recordings from CHO cells co-transfected  
818 with Dr-VSP and KCNQ3T or the indicated mutant channels. (E) Bars summarize time constant values from  
819 single exponential fits to current decay during Dr-VSP activation ( $n = 5-10$ ). (F) Bars summarize time  
820 constants of single exponential fits to current recovery after Dr-VSP turn-off ( $n = 5-11$ ). (G) Bars  
821 Summarize fractional inhibition after M<sub>1</sub>R stimulation for the indicated mutant channels ( $n = 3-7$ ). \*  $p <$   
822  $0.05$ ; \*\*  $p < 0.01$ ; \*\*\*  $p < 0.001$ .

824

### 825 **Figure 3. Effects of charge neutralizing mutations located in the S6Jx on KCNQ3T channels.**

826 (A) Representative perforated patch-clamp recordings from KCNQ3T and mutant channels. (B) Bars show  
827 summarized current densities at 60 mV for the indicated channels ( $n = 6-19$ ). (C) Voltage dependence of  
828 activation of the tail currents at -60 mV, plotted as a function of test potential ( $n = 6-19$ ). (D) Representative  
829 perforated patch-clamp recordings from CHO cells co-transfected with Dr-VSP and KCNQ3T or mutant  
830 KCNQ3T channels. (E) Bars summarize time constants from single-exponential fits to current decay during  
831 Dr-VSP activation ( $n = 5-10$ ). (F) Bars summarize time constants from single-exponential fits to recovery  
832 after Dr-VSP turn-off ( $n = 5-11$ ). \*\*  $p < 0.01$ ; \*\*\*  $p < 0.001$ .

833

### 834 **Figure 4. Effects of the A-B linker deletion on KCNQ3T channels.**

835 (A) Representative perforated patch-clamp recordings from cells expressing Dr-VSP and either KCNQ3T,  
836 KCNQ3T ( $\Delta$  linker) or KCNQ3T (RH-AC/ $\Delta$  linker). Cells were held at -80 mV and voltage steps were  
837 applied from -80 to 60 mV in 10 mV increments every 3s. (B) Bars show summarized current densities at 60  
838 mV for the indicated channels ( $n = 8-19$ ). (C) Shown are the amplitude of tail currents at -60 mV, plotted as  
839 a function of test potential from KCNQ3T and KCNQ3T ( $\Delta$  linker) channels ( $n = 11-19$ ). (D) Representative  
840 perforated patch-clamp recordings from CHO cells co-transfected with Dr-VSP and KCNQ3T or KCNQ3T  
841 ( $\Delta$  linker) or the RH-AC/ $\Delta$  linker mutants. (E) Bars summarize time constants from single-exponential fits to

842 current decay during Dr-VSP activation (n = 6-10). (F) Bars summarize time constants from single-  
843 exponential fits to recovery after Dr-VSP turn-off (n = 6-11). \* p < 0.05, \*\*\* p < 0.001.

844

845 **Figure 5. TIRF microscopy indicates that mutants in PIP<sub>2</sub>-interacting domains result in minor**  
846 **differences in membrane expression of channels.**

847 (A) Shown are fluorescent images under TIRF microscopy of CHO cells expressing the indicated YFP-

848 tagged channels. (B) Bars show summarized emission intensity data for each channel type (n = 32-60).

849

850 **Figure 6. Charge neutralizing mutations at the S2-S3 and S4-S5 linkers and S6Jx disrupt PIP<sub>2</sub>**  
851 **interactions of the KCNQ3 channel.**

852 Shown are 3D structural models of the most favourable docking PIP<sub>2</sub>-docking conformation of the KCNQ3  
853 channel after simulation of charge neutralization at the putative PIP<sub>2</sub> binding site residues R190 in the S2-S3  
854 linker (A), R242 and H257 in the S4-S5 linker (B and C), and R364, K358-R364-K366 (KRK-AAA) and  
855 H367 within the S6Jx (D, E, F). As indicated in Fig. 1, binding sites are enclosed in red boxes and enlarged  
856 for clarity in the right panels. Upper panels show two neighboring subunits (Sub-C and Sub-D) or a single  
857 Sub forming the binding site. The following are the favorable interactions (labeled in red) predicted to be in  
858 the PIP<sub>2</sub>-docking-network (< 6.0 Å, kJ/M): R190A in panel A, R242 = -4.80, R243 = -2.40, K358 = -4.31;  
859 R242A in panel B, R243 = -24.9, H363 = -4.07, K366 = -7.63; H257N in panel C, R242 = -18.8, R243 = -  
860 5.41, K358 = -3.11, K366 = -7.52; R364A in panel D, R242 = -12.80, R243 = -4.54, K358 = -3.20; KRK-  
861 AAA in panel E, R242 = -27.20, R243 = -3.73, H257 = -1.23; H367A in panel F, R242 = -10.3, R243 = -  
862 3.53, K358 = -5.08; K358A in panel G, R242 = -7.43, R243 = -2.57, H257 = -5.42; K366A in panel H, R242  
863 = -4.62, R243 = -2.03, H257 = -4.34, K358 = -2.78.

864

865 Figure 7. Effects of charge neutralization of residues predicted within the PIP<sub>2</sub> docking site of KCNQ3 in  
866 the closed state. (A) **Sequence alignments of human KCNQ channels show the additional basic residues**  
867 **K103, R188, R227, and R230 tested in this study by mutagenesis. Predicted secondary structure of the**  
868 **channel is indicated above the alignments as solid lines ( $\alpha$ -helices) and non-continuous lines (linkers).**  
869 **(B) Ribbon representations of the arrangement of the VSD-PD interface of a structural subunit model**  
870 **viewed from the outer and inner side (upper panels), and membrane plane (bottom panels). The**  
871 **secondary structure of the channels and PIP<sub>2</sub> molecules are shown as in Fig. 1. (C) Expanded view of**  
872 **the most favourable interaction predicted of PIP<sub>2</sub> in the closed-channel state. The phosphate group of the**  
873 **PIP<sub>2</sub> is oriented toward the S2-S3 linker, whereas the acyl tail is enclosed within the  $\alpha$ -helices. The**  
874 **following are the favorable interactions (label in red) predicted to be in the PIP<sub>2</sub>-docking-network (< 6.0**  
875 **Å): K103 = -4.03, R188 = -1.44, R190 = -1.52, R227 = -3.23, R230 = -5.36. (D) Top, Representative**  
876 **perforated patch-clamp recordings from CHO cells co-transfected with Dr-VSP and KCNQ3T or the**  
877 **indicated mutants. Cells were held at -60 mV and current decay measured at 100 mV, and recovery of the**  
878 **current measured at 0 mV after the depolarization to 100 mV. Note the larger amplitude of the recovery**  
879 **current in these experiments after turn-off of Dr-VSP, due to the voltage used (0 mV), at which the “leak”**  
880 **current is expected to minimal, compared to +30 mV Bottom, Bars summarize the data from these**  
881 **experiments (n = 5-11). \* p < 0.05 and \*\* p < 0.01.**

TABLE 1

Effects of mutations on the properties and PIP<sub>2</sub>-apparent affinities of KCNQ3 channels

| KCNQ3T         | Structural domain | Channel Function        |                          | Rates from Dr-VSP assays  |                           |
|----------------|-------------------|-------------------------|--------------------------|---------------------------|---------------------------|
|                |                   | Current Density (pA/pF) | V <sub>1/2</sub> (mV)    | τ, decay at +120 mV (s)   | τ, recovery at +30 mV (s) |
| WT             | -                 | 197 ± 6<br>(n = 19)     | -34.0 ± 1.9<br>(n = 19)  | 0.94 ± 0.13<br>(n = 10)   | 7.5 ± 1.7<br>(n = 11)     |
| R190Q          | S2-S3 linker      | 66 ± 12***<br>(n = 6)   | -39.9 ± 1.9<br>(n = 5)   | 0.35 ± 0.11**<br>(n = 8)  | 9.6 ± 1.6<br>(n = 8)      |
| R195Q          | S2-S3 linker      | 195 ± 13<br>(n = 6)     | -36.0 ± 1.8<br>(n = 6)   | 0.98 ± 0.22<br>(n = 5)    | 7.4 ± 1.0<br>(n = 5)      |
| R242A          | S4-S5 linker      | 146 ± 16***<br>(n = 10) | -4.0 ± 3.2***<br>(n = 7) | 0.77 ± 0.13<br>(n = 10)   | 14.2 ± 1.7*<br>(n = 10)   |
| R243A          | S4-S5 linker      | 56 ± 16***<br>(n = 4)   | -31 ± 4.7<br>(n = 4)     | 0.59 ± 0.19*<br>(n = 4)   | 13.1 ± 1.8*<br>(n = 4)    |
| R242A-R243A    | S4-S5 linker      | 65 ± 11***<br>(n = 11)  | -0.2 ± 2.9***<br>(n = 5) | 0.45 ± 0.11**<br>(n = 5)  | 15 ± 1.7*<br>(n = 5)      |
| H257N          | S4-S5 linker      | 30 ± 3***<br>(n = 7)    | 2.5 ± 2.8***<br>(n = 7)  | 0.58 ± 0.14*<br>(n = 4)   | 11.03 ± 1.4<br>(n = 2)    |
| K358A          | S6Jx              | 195 ± 7<br>(n = 9)      | -28.8 ± 2.2<br>(n = 9)   | 0.94 ± 0.25<br>(n = 6)    | 8.0 ± 1.7<br>(n = 6)      |
| R364A          | S6Jx              | 72 ± 8***<br>(n = 6)    | -30.1 ± 2<br>(n = 6)     | 0.14 ± 0.02***<br>(n = 5) | 27.7 ± 6.9***<br>(n = 5)  |
| K366A          | S6Jx              | 187 ± 12<br>(n = 8)     | -29.6 ± 1.3<br>(n = 8)   | 0.95 ± 0.12<br>(n = 7)    | 9.2 ± 1.7<br>(n = 6)      |
| KRK-AAA        | S6Jx              | 79 ± 11***<br>(n = 8)   | -6.3 ± 2.5***<br>(n = 7) | 0.29 ± 0.04***<br>(n = 7) | 17.9 ± 2.6***<br>(n = 6)  |
| H367C          | S6Jx              | 138 ± 5**<br>(n = 6)    | -25.0 ± 2.1*<br>(n = 6)  | 0.32 ± 0.05**<br>(n = 6)  | 36.7 ± 6.9***<br>(n = 6)  |
| (Δ linker)     | C-term            | 112 ± 10***<br>(n = 11) | -32.5 ± 1.5<br>(n = 11)  | 0.26 ± 0.04***<br>(n = 7) | 13.5 ± 2.2*<br>(n = 7)    |
| RH-AC/Δ linker | C-term            | 16 ± 2***<br>(n = 8)    | ND                       | 0.53 ± 0.1*<br>(n = 6)    | 45.8 ± 5.2***<br>(n = 6)  |
| K531N          | C-term            | 193 ± 54<br>(n = 8)     | -20.3 ± 6<br>(n = 4)     | 1.05 ± 0.33<br>(n = 7)    | 10 ± 0.9<br>(n = 7)       |
| K532N          | C-term            | 204 ± 48<br>(n = 8)     | -19.9 ± 2.6<br>(n = 6)   | 1.01 ± 0.32<br>(n = 8)    | 9.08 ± 1.4<br>(n = 8)     |
| K533N          | C-term            | 208 ± 62<br>(n = 7)     | -21.1 ± 3.4<br>(n = 7)   | 0.86 ± 0.12<br>(n = 8)    | 8.62 ± 0.6<br>(n = 8)     |

883 Values represent mean ± S.E.M. \*, \*\* and \*\*\*  $P < 0.05$ ,  $P < 0.01$  and  $P < 0.001$  (one-way ANOVA with  
884 Dunnett's multiple comparisons test) statistically different from wild type (WT). N.D. = not determined.

885 **Figure 1**

**A**

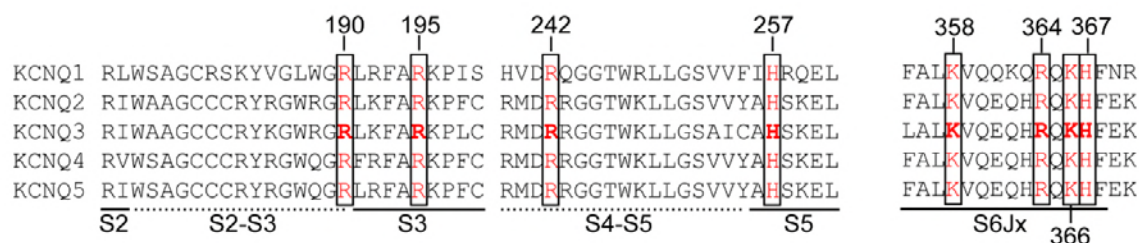

**B**

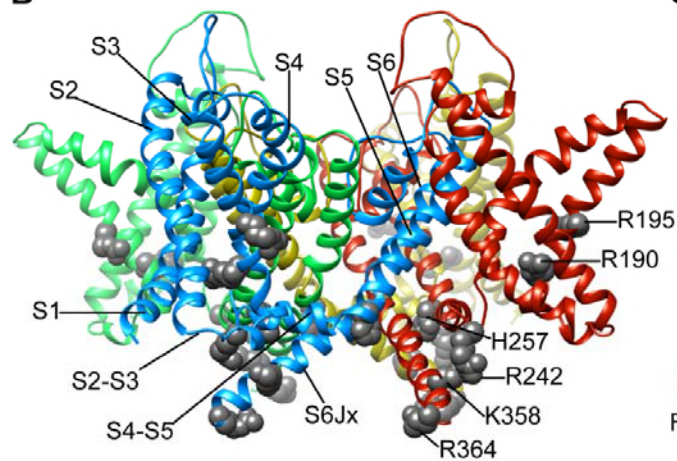

**C**

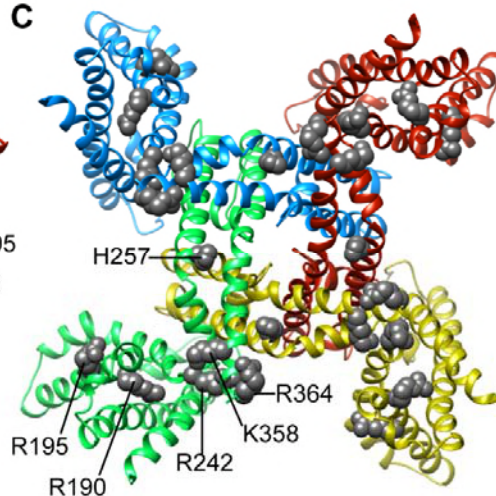

**D**

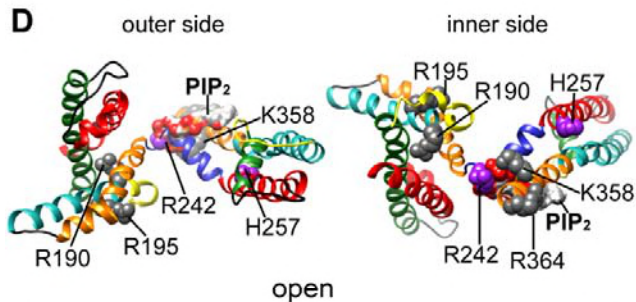

**E**

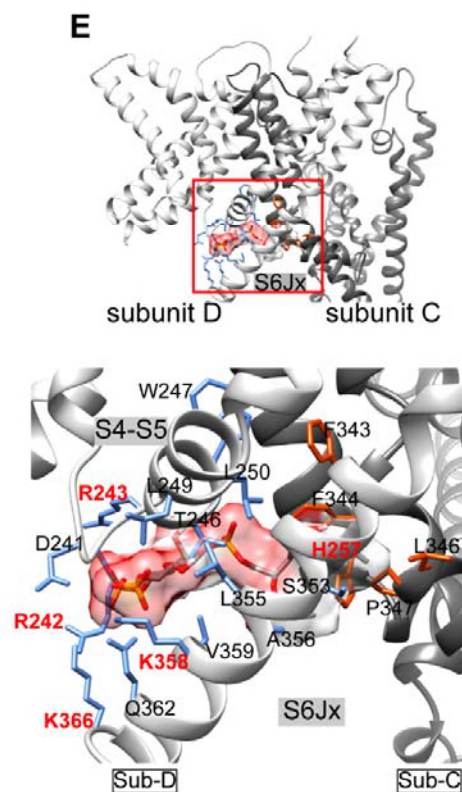

887 **Figure 2**

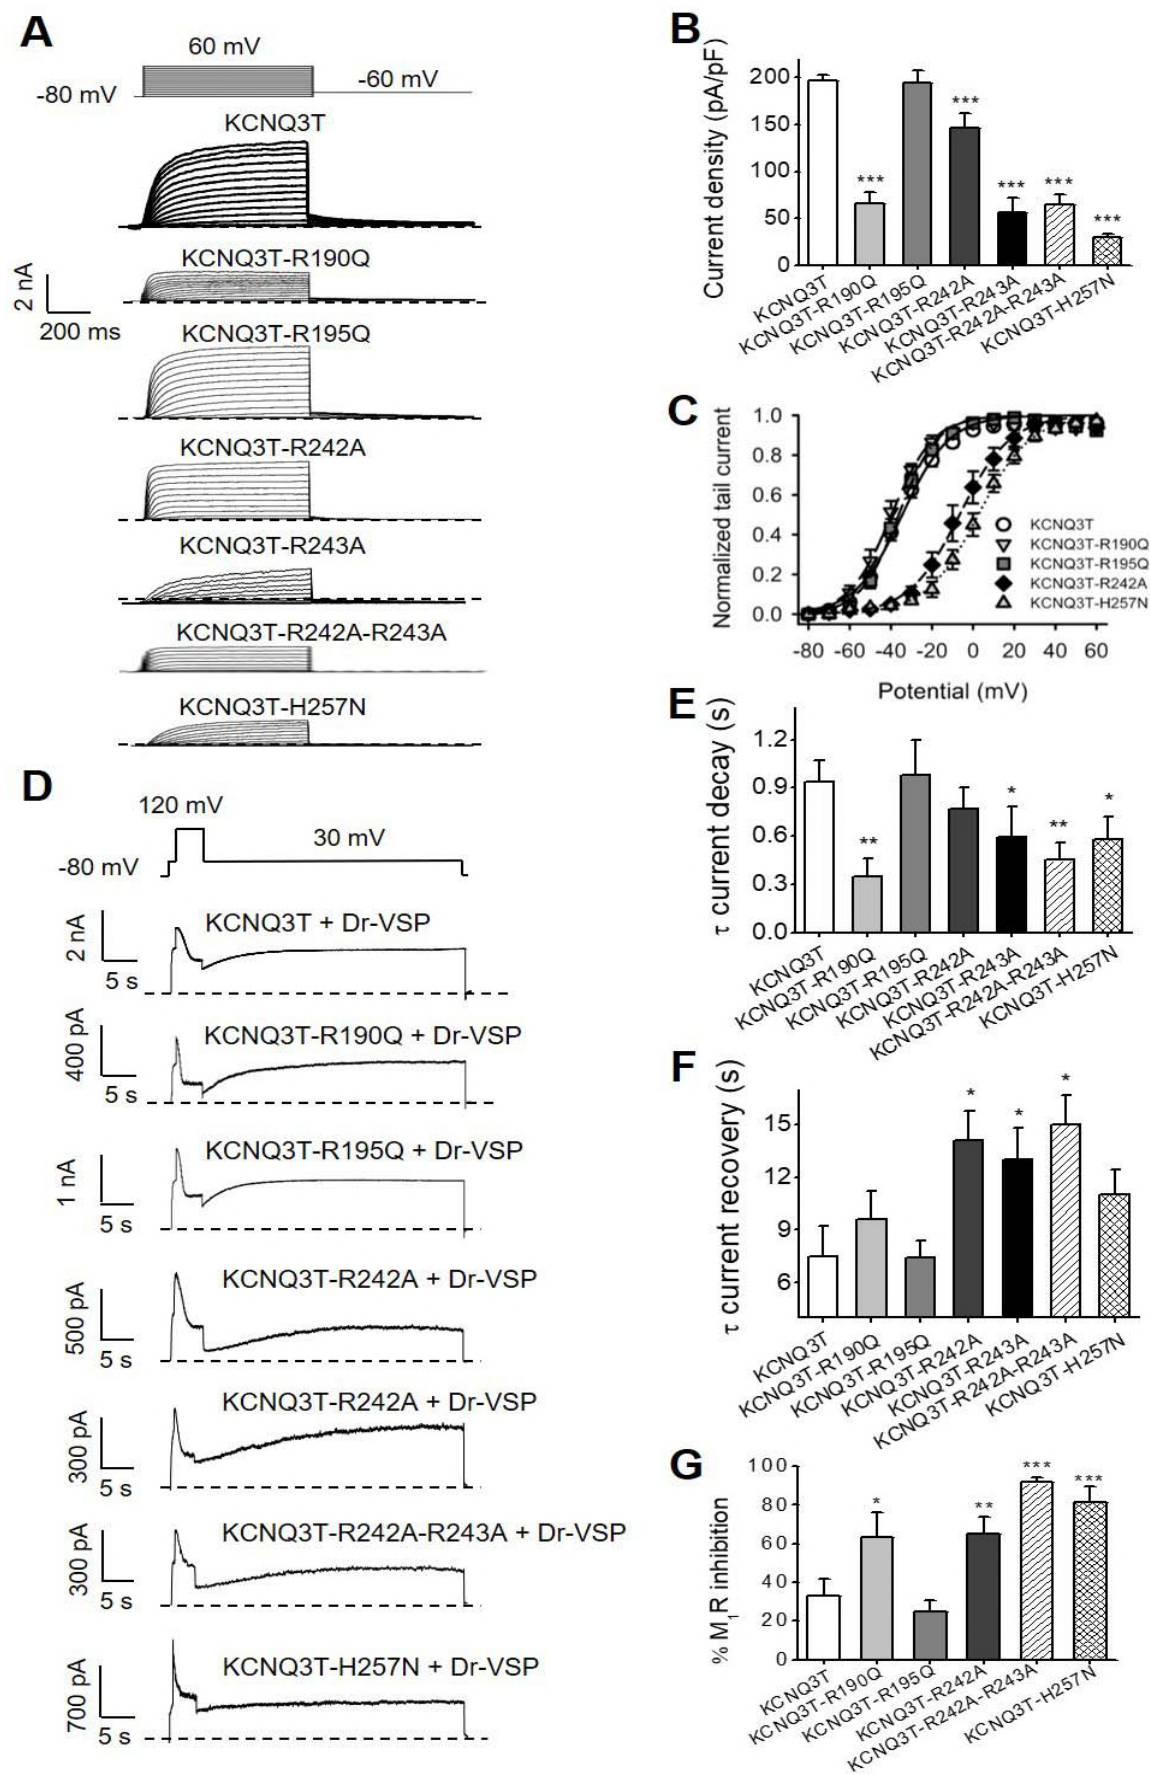

890 **Figure 3**

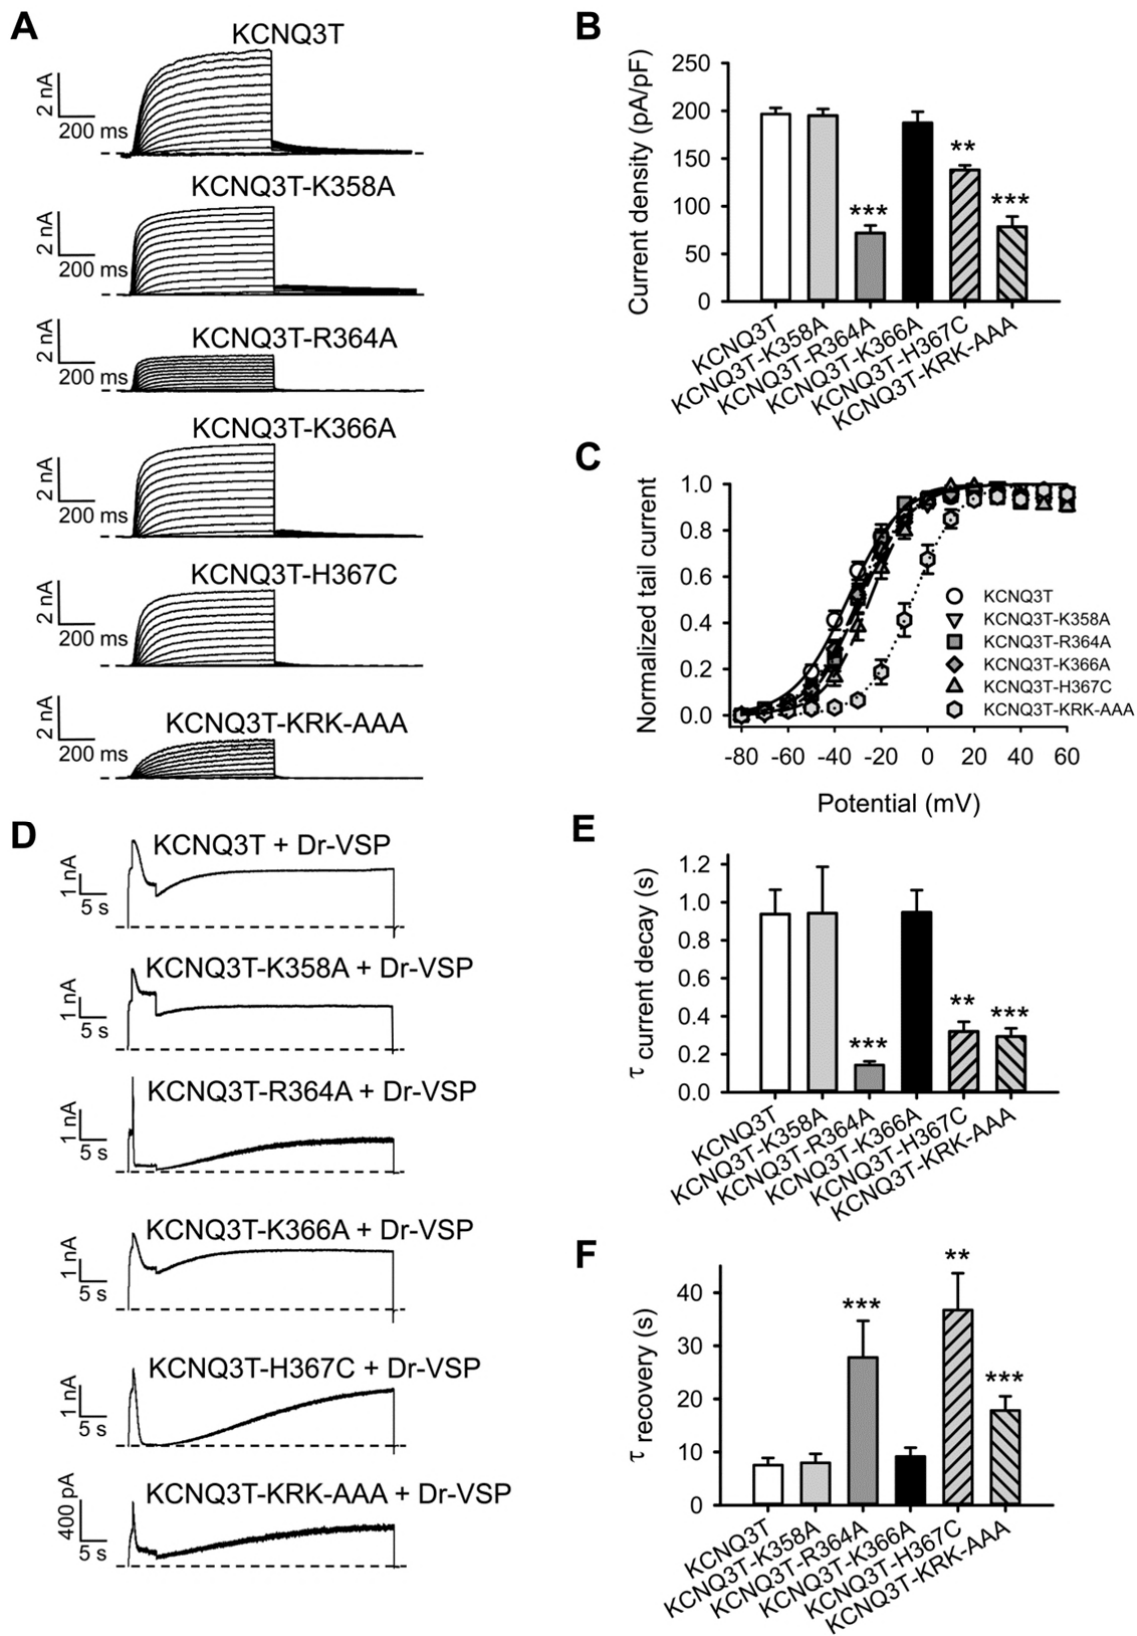

891  
892

893 **Figure 4**

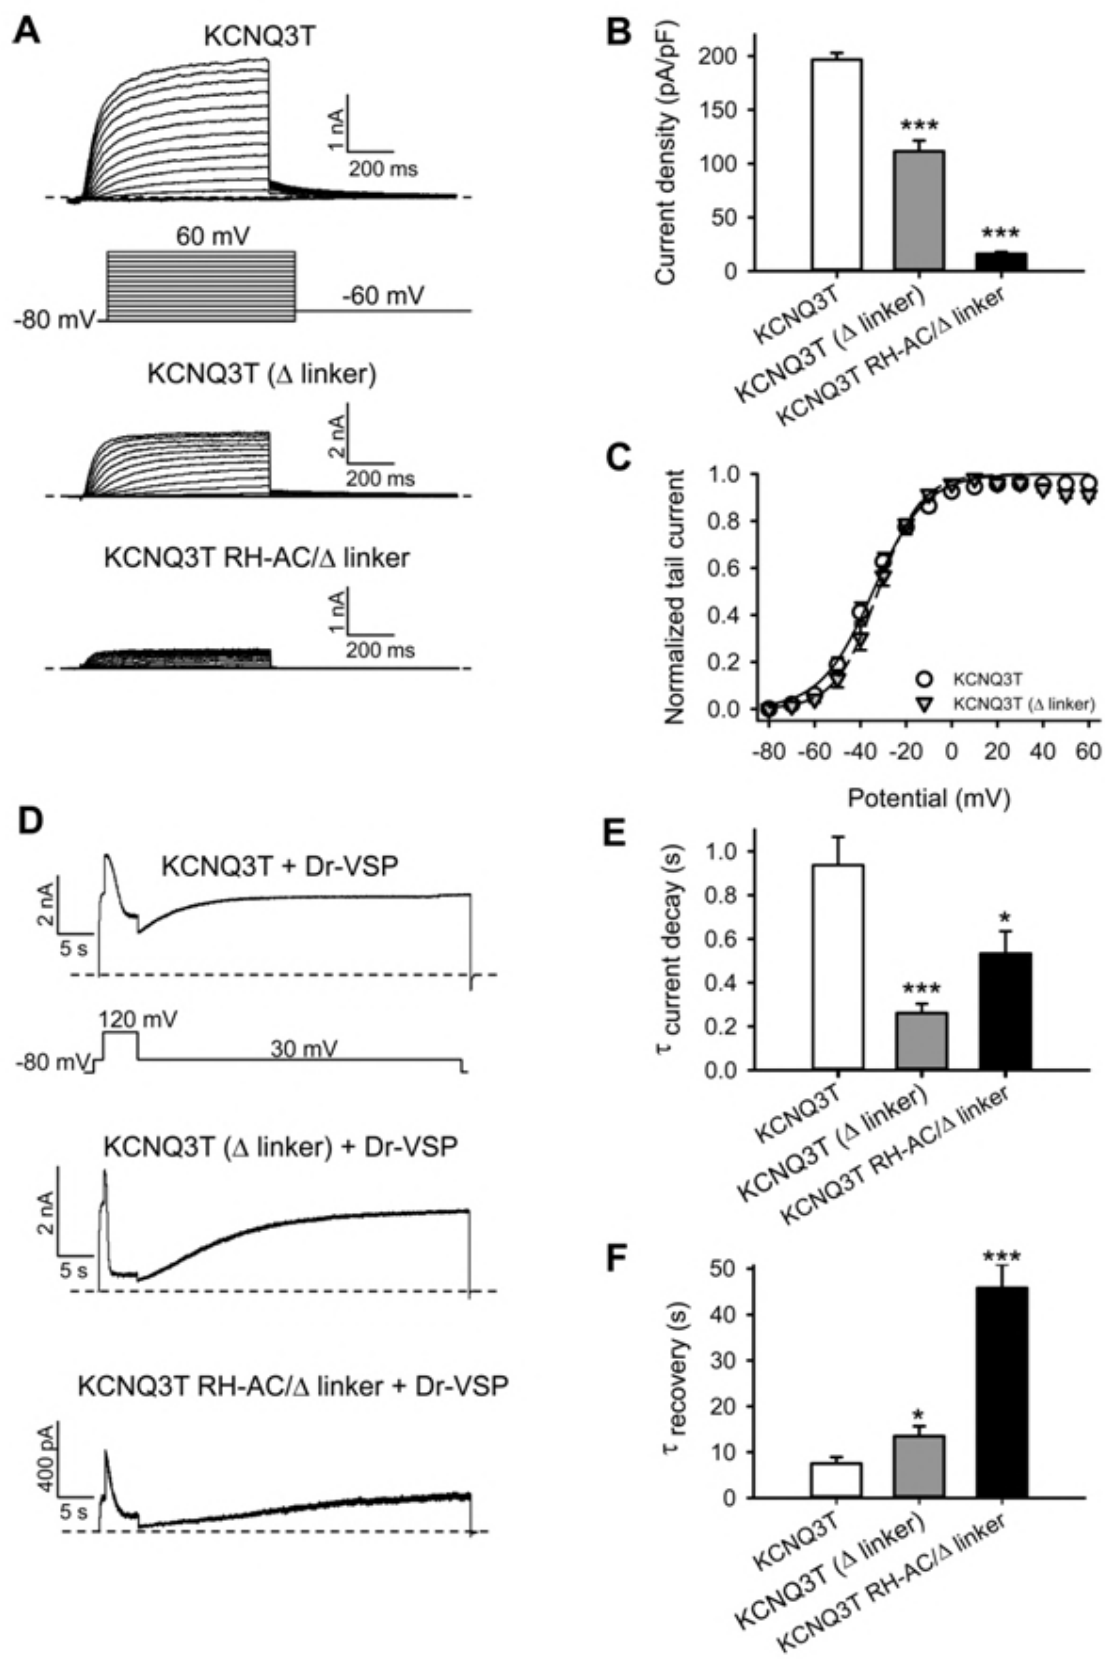

894  
895



896 **Figure 5**

**A**

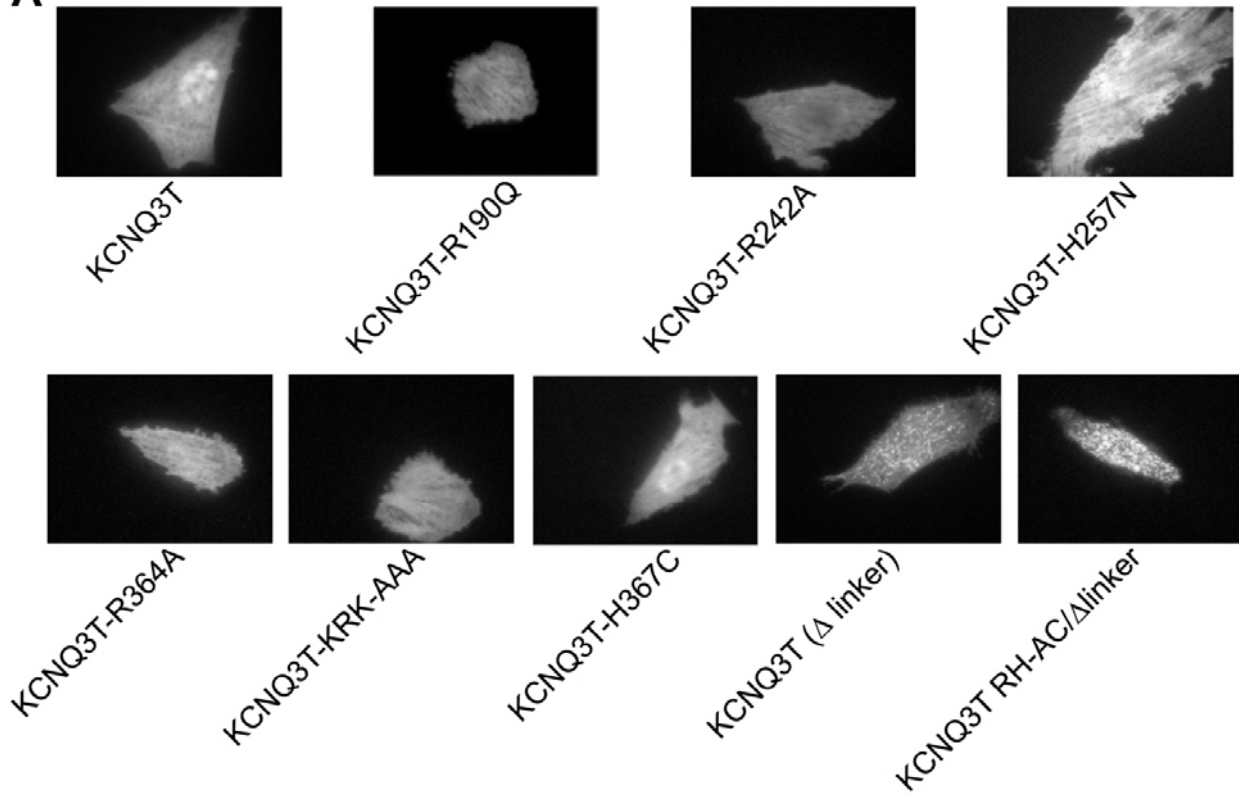

**B**

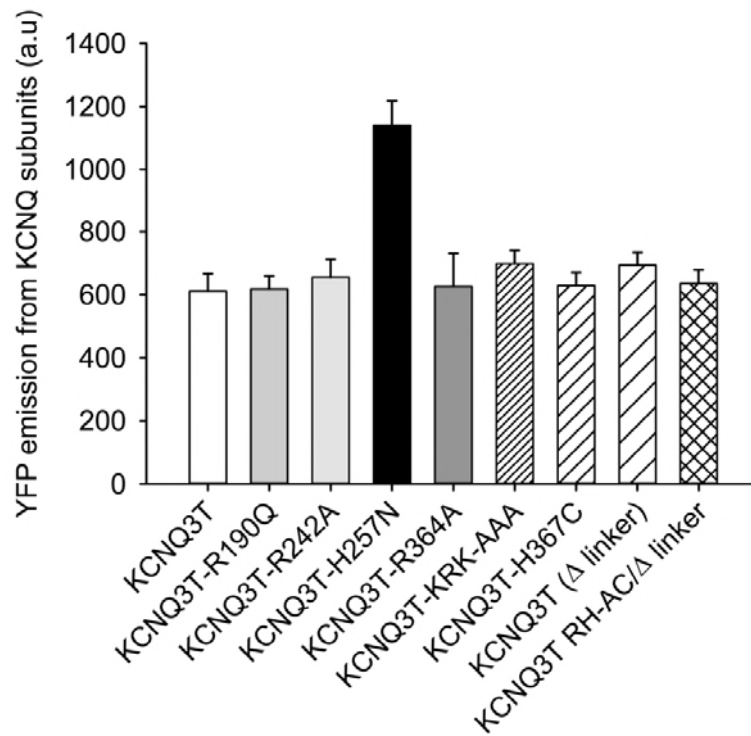

897  
898

899 **Figure 6**

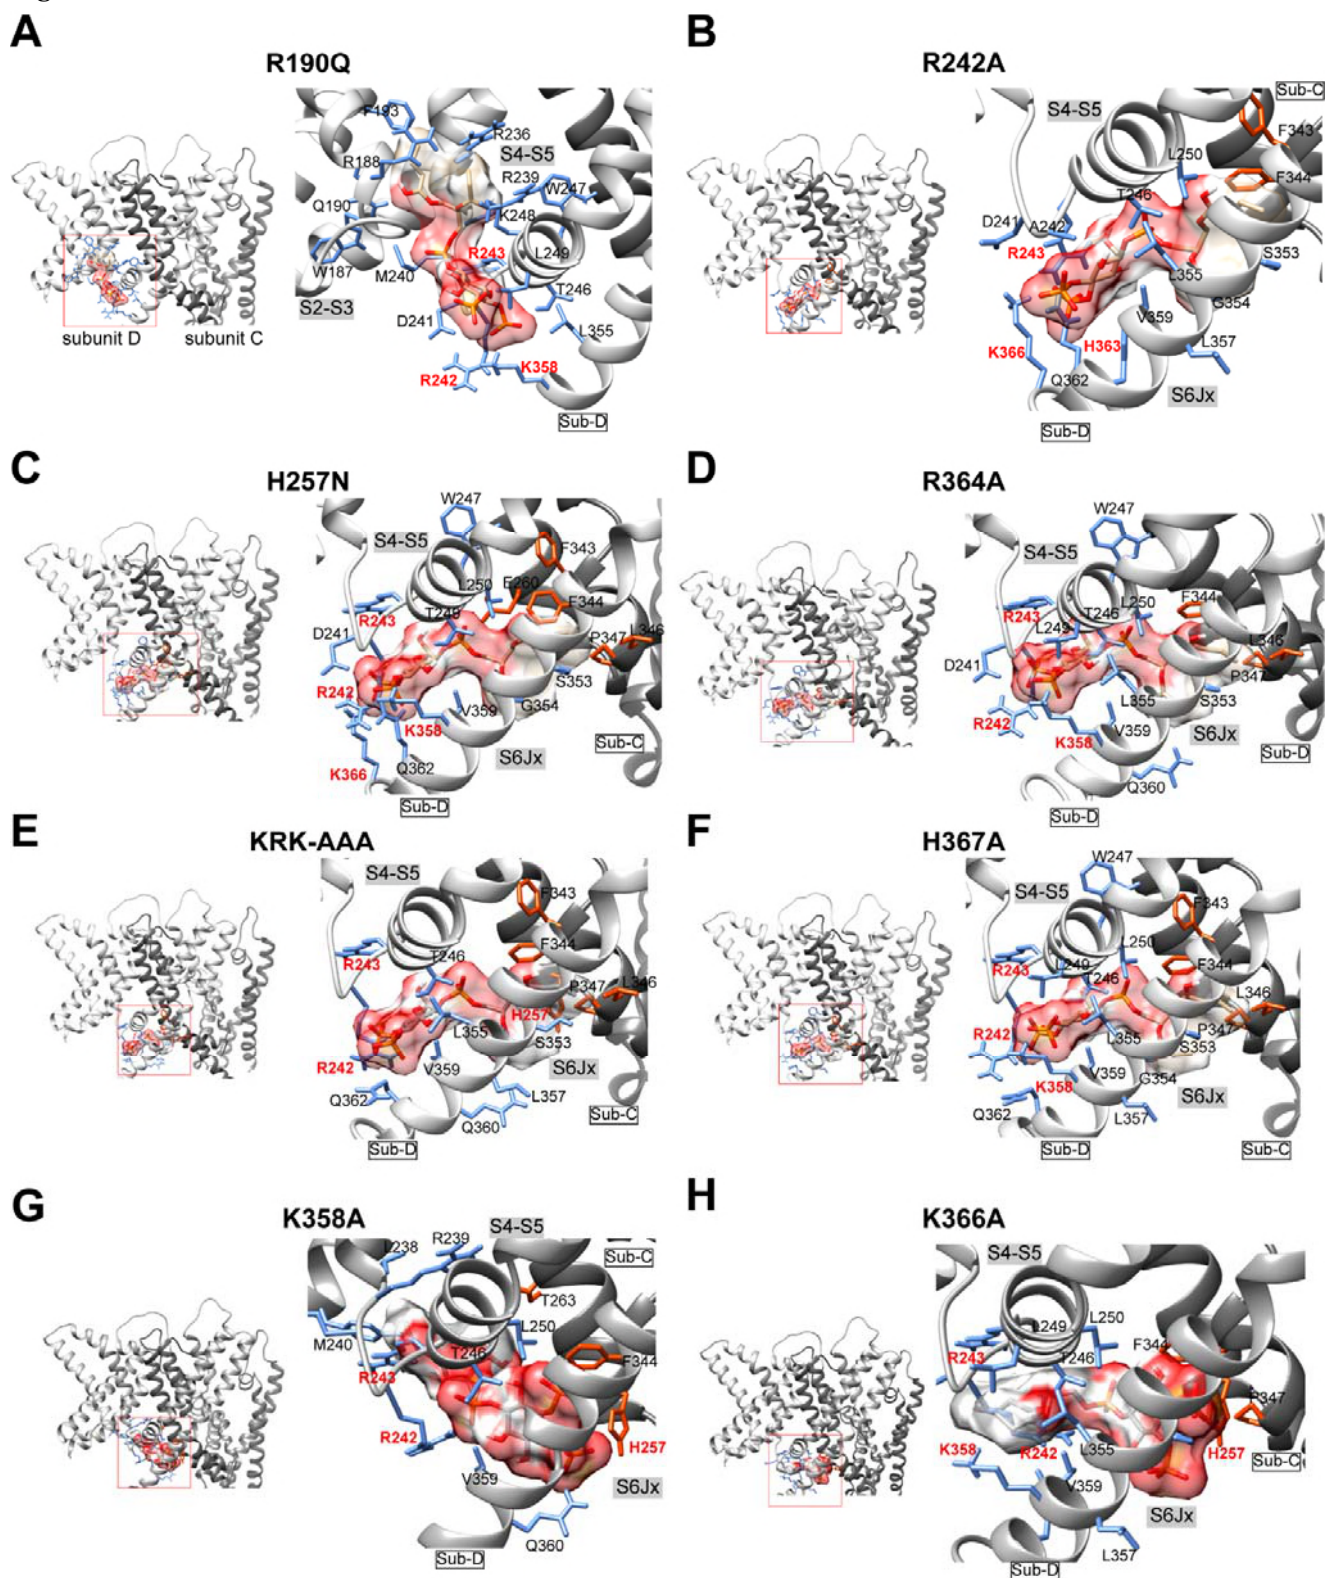

900  
901

902 **Figure 7**

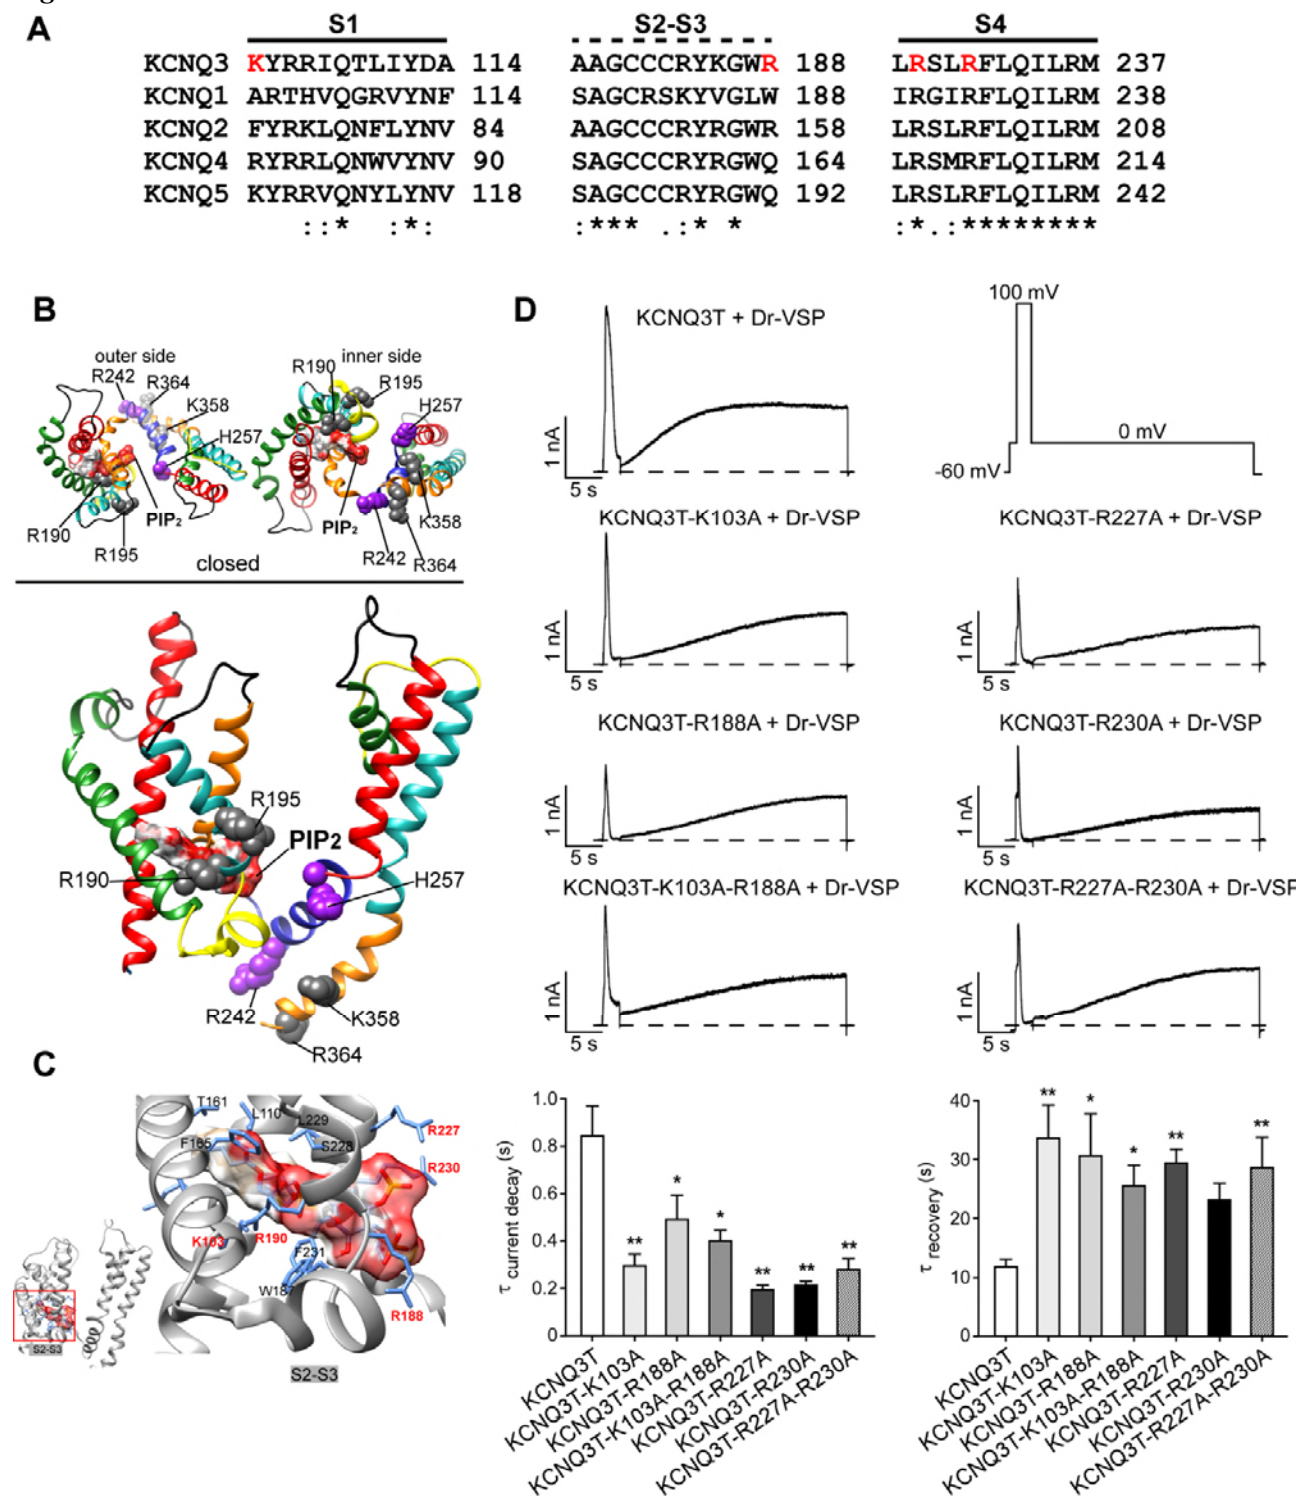

903  
904

905 **Figure S1**

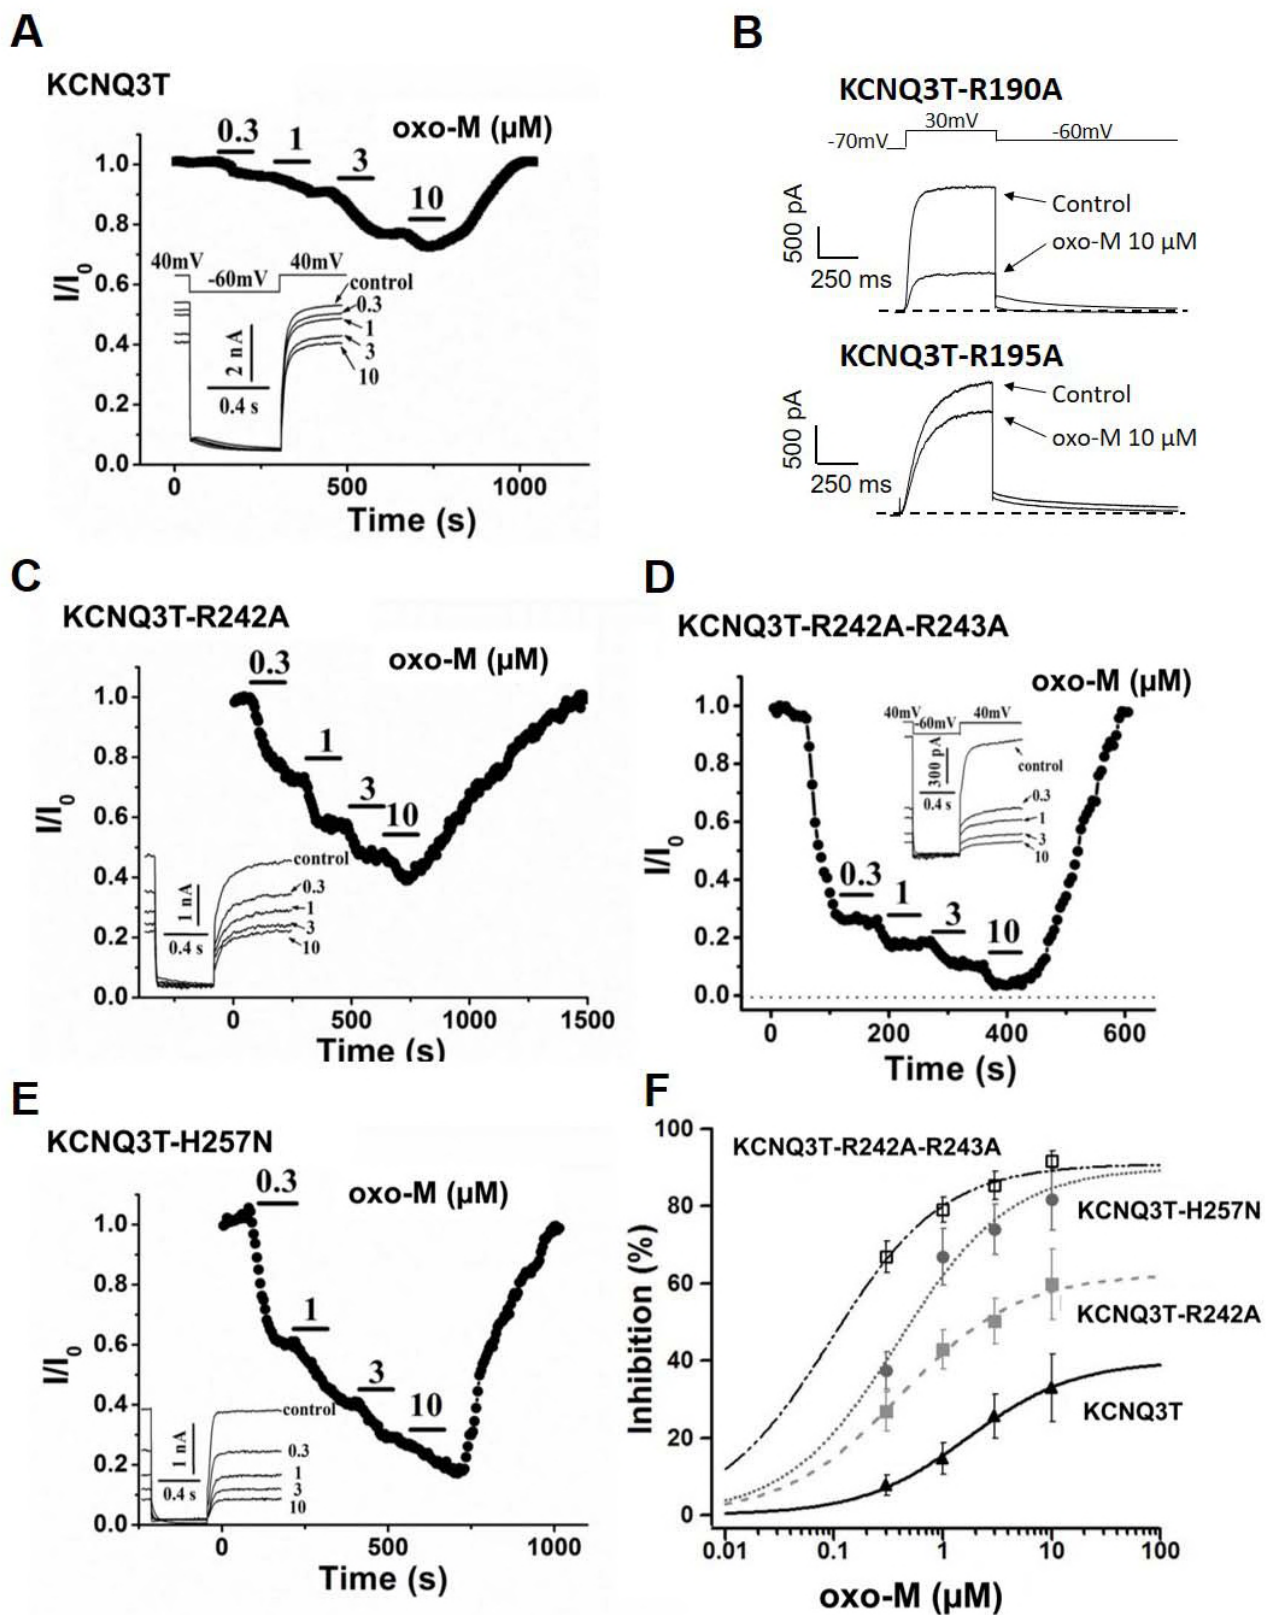

906

907 **Figure S1. Effects of charge neutralizing mutations located in the S4-S5 linker of KCNQ3T channels on**  
 908 **the sensitivity to muscarinic stimulation.**

909 KCNQ3T currents during the experiment from stably M<sub>1</sub> receptor-expressing CHO cells transfected with  
 910 KCNQ3T (A) and the mutants R190A, R195A (B), R242A (C), R242A-R243A (D) and H257N (E). The

911 muscarinic agonist, oxotremorine methiodide (oxo-M), was bath-applied, as indicated. In the insets are  
912 shown KCNQ3 current waveforms before and after the application of oxo-M at the concentrations indicated.  
913 (F) Concentration dependence of inhibition by oxo-M of the WT (closed triangles), R242A (closed squares),  
914 H257N (closed circles), and R242A-R243A (open squares) currents. The line represents the fit of  
915 experimental data by Hill equations. Each point represents the mean  $\pm$  SEM from  $n = 3-7$  experiments.  
916

917 **Figure S2**

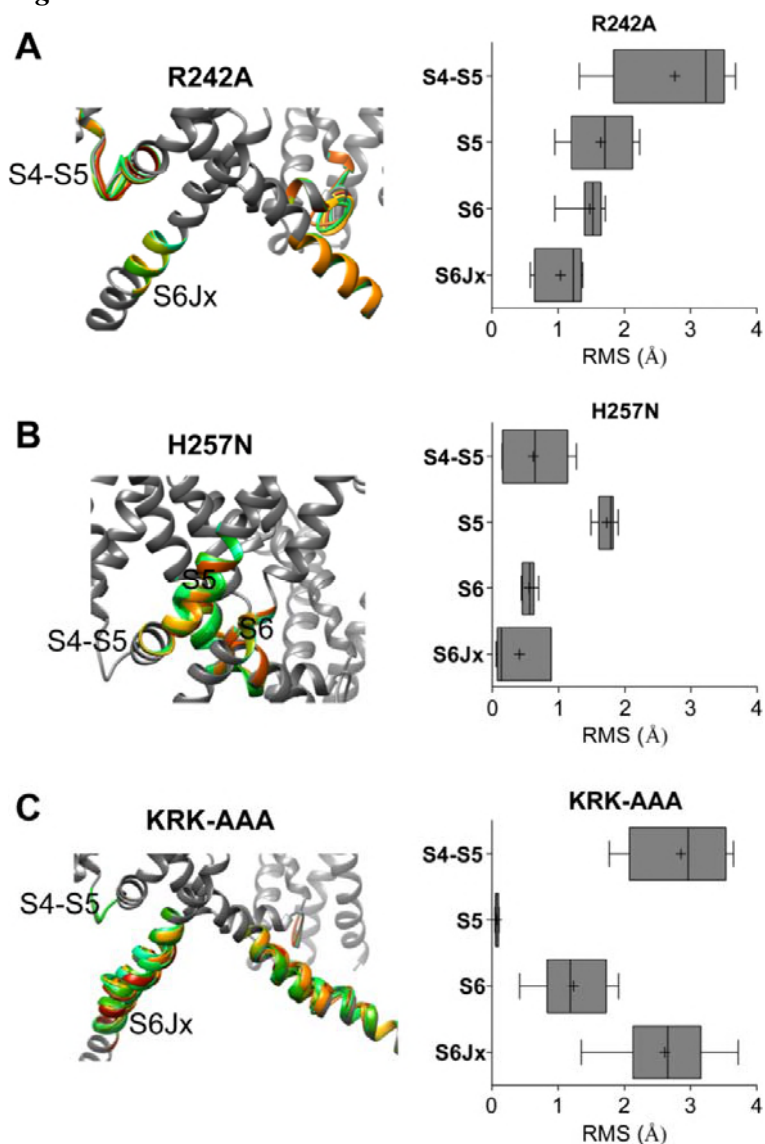

918  
919

920 **Structural perturbations predicted along the S4-S5 linker and the S6Jx are correlated with changes in**  
 921 **VSD-PD coupling.** Enlarged views of the S4-S5 linker, S5 and the S6Jx domains showing structural  
 922 rearrangements predicted for the R242A (A), H257N (B) and KRK-AAA (C) mutant channels. The  
 923 structural elements that differ among the WT and mutant structures are indicated, and shown in gray (WT)  
 924 and in rainbow (mutant) on the structures. The right panels show the root mean square deviation (RMS) bar  
 925 plots with the disordered structural elements that differ among the WT and mutant structures. These are  
 926 represented as interleaved box and whiskers (25-75% percentile, median, and minimum and maximum) by  
 927 structural elements.
